# Supplementary material for: UBR4/POE facilitates secretory trafficking to maintain circadian clock synchrony
Source: PubMed Central journal article supplement (PMC8948264; doi:10.1038/s41467-022-29244-1), 2022-03-24
Supplement: 41467_2022_29244_MOESM1_ESM.pdf [file 41467_2022_29244_MOESM1_ESM.pdf]

## SUPPLEMENTARY INFORMATION

### **UBR4/POE facilitates secretory trafficking to maintain circadian clock synchrony**

Sara Hegazi,<sup>1,2</sup> Arthur H. Cheng,<sup>1,2</sup> Joshua J. Krupp,<sup>1</sup> Takafumi Tasaki,<sup>3,4</sup> Jiashu Liu,<sup>1,2</sup> Daniel A. Szulc,<sup>5,6</sup> Harrod H. Ling,<sup>1,2#</sup> Julian Rios Garcia,<sup>1,2</sup> Shavanie Seecharran,<sup>1,2</sup> Tayebbeh Basiri,<sup>7</sup> Mehdi Amiri,<sup>7</sup> Zobia Anwar,<sup>1,2</sup> Safa Ahmad,<sup>1</sup> Kamar Nayal,<sup>1,2</sup> Nahum Sonenberg,<sup>7</sup> Bao-hua Liu,<sup>1,2</sup> Hai-Ling Margaret Cheng,<sup>5,6,8</sup> Joel D. Levine,<sup>1,2,9\*</sup> Hai-Ying Mary Cheng<sup>1,2\*</sup>

<sup>1</sup> Department of Biology, University of Toronto Mississauga, Mississauga, ON L5L 1C6, Canada

<sup>2</sup> Department of Cell and Systems Biology, University of Toronto, Toronto, ON M5S 3G5, Canada

<sup>3</sup> Division of Protein Regulation Research, Medical Research Institute, Kanazawa Medical University, Uchinada, Ishikawa 920-0293, Japan

<sup>4</sup> Department of Medical Zoology, Kanazawa Medical University, Uchinada, Ishikawa 920-0293, Japan

<sup>5</sup> Institute of Biomedical Engineering, University of Toronto, Toronto, ON M5S 3G9, Canada

<sup>6</sup> Ted Rogers Centre for Heart Research, Translational Biology & Engineering Program, University of Toronto, Toronto, ON M5G 1M1, Canada

<sup>7</sup> Department of Biochemistry, Goodman Cancer Research Center, McGill University, Montreal, QC H3A 1A3, Canada

<sup>8</sup> The Edward S. Rogers Sr. Department of Electrical & Computer Engineering, University of Toronto, Toronto, ON M5S 3G4, Canada

<sup>9</sup> Department of Ecology and Evolutionary Biology, University of Toronto, Toronto, ON M5S 3B2

\*Correspondence should be directed to [haiying.cheng@utoronto.ca](mailto:haiying.cheng@utoronto.ca) and [joel.levine@utoronto.ca](mailto:joel.levine@utoronto.ca)

#deceased

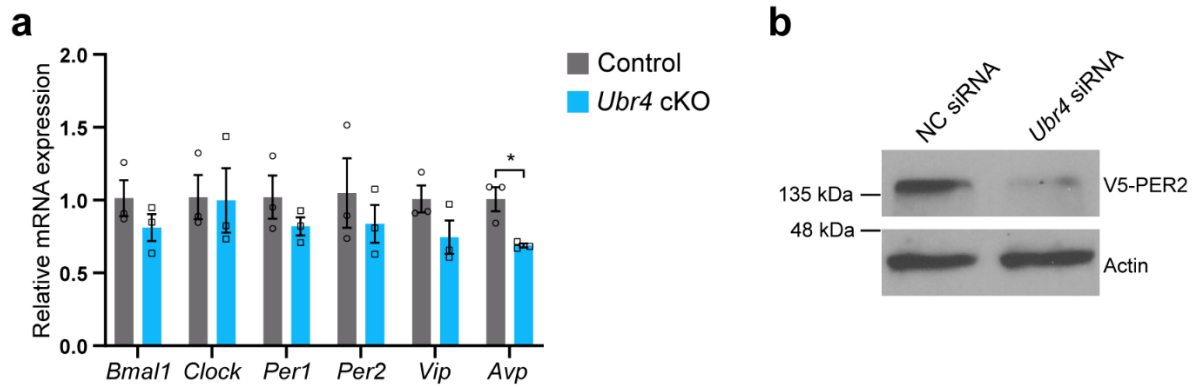

**Supplementary Figure 1. Effects of *Ubr4* ablation or knockdown on clock gene expression.**  
**a** qRT-PCR analyses of clock gene expression in the SCN at CT 9. Values represent mean  $\pm$  SEM.  $n = 3$  samples per group. Two-tailed unpaired t-test conducted for each gene.  $*p = 0.0189$  vs. control. **b** Western blot of lysates from Neuro-2a cells that had been transfected with V5-PER2 along with either negative control (NC) siRNA or *Ubr4* siRNA. Antibodies against V5 (top) and actin (bottom) were used. Source data are provided as a Source Data file.

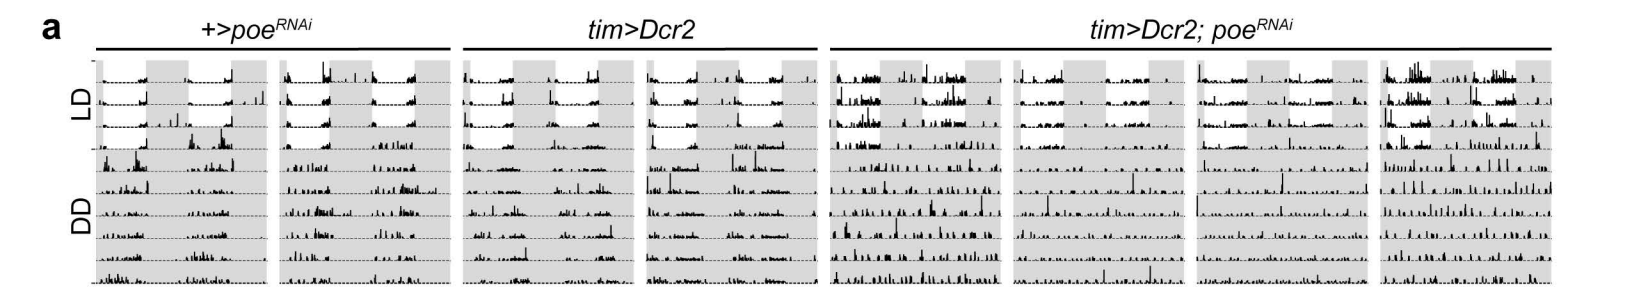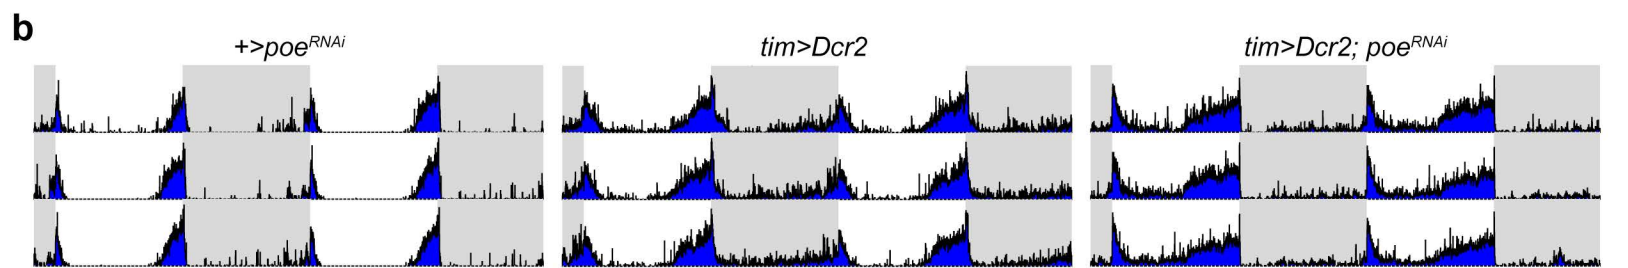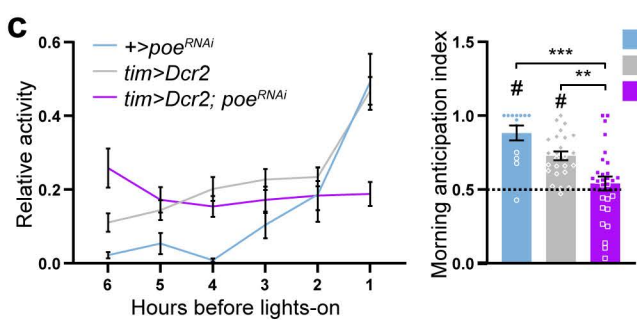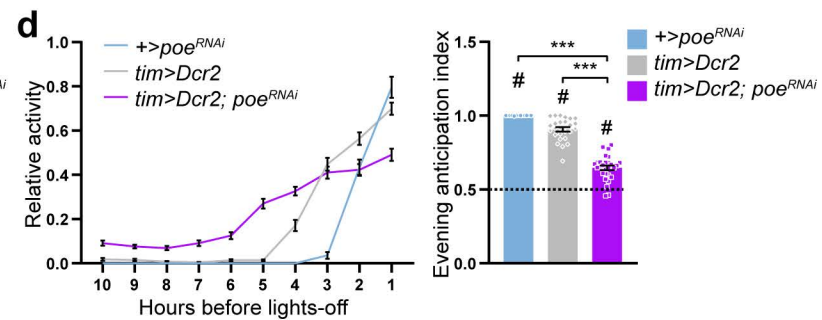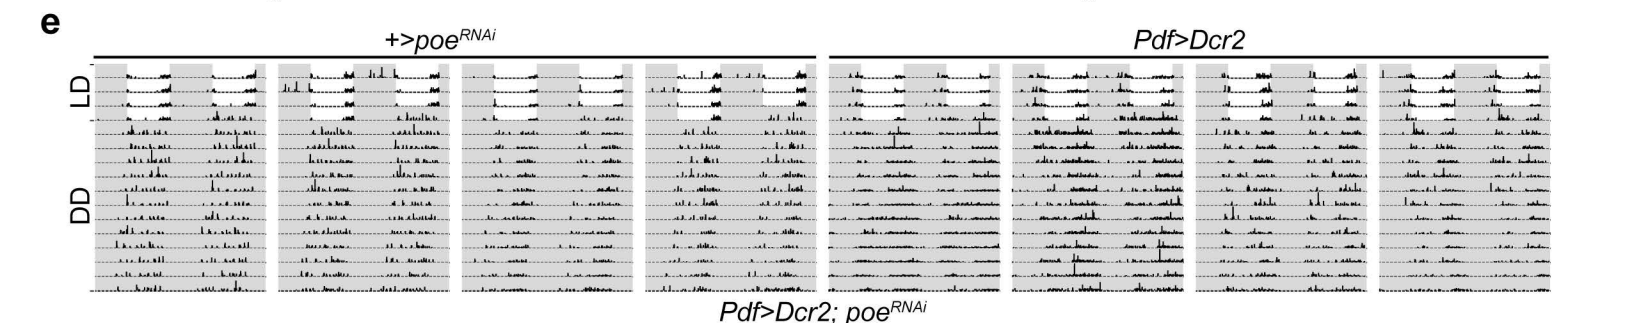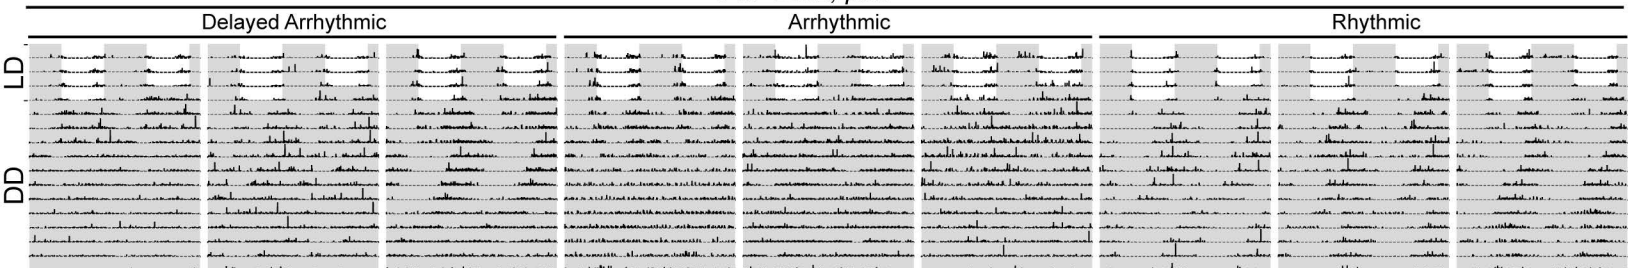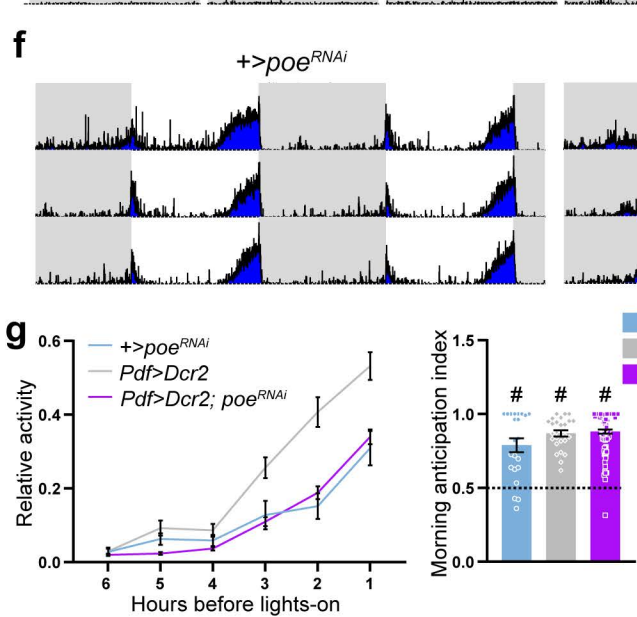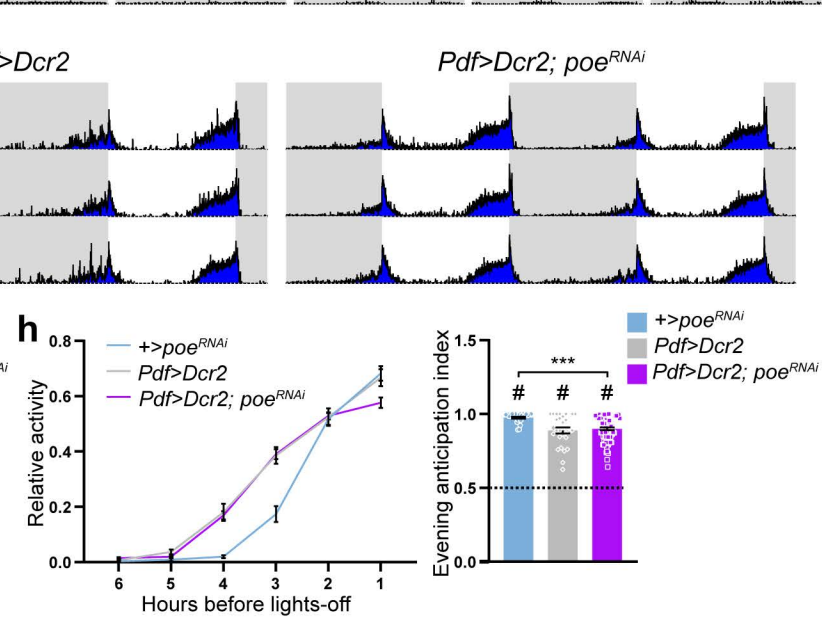

**Supplementary Figure 2. *Poe* knockdown in *D. melanogaster* clock neurons impairs behavioral rhythms.** **a, e** Representative actograms of individual *tim>Dcr2; poe<sup>RNAi</sup>* flies and controls (**a**), or individual *Pdf>Dcr2; poe<sup>RNAi</sup>* flies and controls (**e**), under 12:12 LD and DD conditions. **b, f** Averaged actograms of *tim>Dcr2; poe<sup>RNAi</sup>* flies and controls (**b**), or *Pdf>Dcr2; poe<sup>RNAi</sup>* flies and controls (**f**), under 12:12 LD conditions. **c** Mean relative activity counts during the hours preceding lights-on (left), and quantification of morning anticipation index (right) of *tim>Dcr2; poe<sup>RNAi</sup>* flies and controls under LD conditions. +>*poe<sup>RNAi</sup>*: n = 13, *tim>Dcr2*: n = 25, *tim>Dcr2; poe<sup>RNAi</sup>*: n = 28. #*p*<0.0001 by one-sample t-test compared to the value of 0.5; values greater than 0.5 indicate anticipatory behavior. \*\**p* = 0.0041, \*\*\**p*<0.0001 vs. controls; one-way ANOVA with Bonferroni's post hoc. **d** Mean relative activity counts during the hours preceding lights-off (left), and quantification of evening anticipation index (right) of *tim>Dcr2; poe<sup>RNAi</sup>* flies and controls under LD conditions. +>*poe<sup>RNAi</sup>*: n = 13, *tim>Dcr2*: n = 26, *tim>Dcr2; poe<sup>RNAi</sup>*: n = 28. #*p*<0.0001 by one-sample t-test compared to the value of 0.5; values greater than 0.5 indicate anticipatory behavior. \*\*\**p*<0.0001 as indicated; Kruskal-Wallis with a Dunn's post hoc. (Note: SEM of the mean evening anticipation index of +>*poe<sup>RNAi</sup>* flies = 0.0003). **g** Mean relative activity counts during the hours preceding lights-on (left), and quantification of morning anticipation index (right) of *Pdf>Dcr2; poe<sup>RNAi</sup>* flies and controls under LD conditions. +>*poe<sup>RNAi</sup>*: n = 22, *Pdf>Dcr2*: n = 27, *Pdf>Dcr2; poe<sup>RNAi</sup>*: n = 88. #*p*<0.0001 by one-sample t-test compared to the value of 0.5; values greater than 0.5 indicate anticipatory behavior. Kruskal-Wallis with a Dunn's post hoc was used for between group testing. **h** Mean relative activity counts during the hours preceding lights-off (left), and quantification of evening anticipation index (right) of *Pdf>Dcr2; poe<sup>RNAi</sup>* flies and controls under LD conditions. +>*poe<sup>RNAi</sup>*: n = 26, *Pdf>Dcr2*: n = 28, *Pdf>Dcr2; poe<sup>RNAi</sup>*: n = 90. #*p*<0.0001 by one-sample t-test compared to the value of 0.5; values greater than 0.5 indicate anticipatory behavior. \*\*\**p*<0.0001 as indicated; Kruskal-Wallis with a Dunn's post hoc. Values represent mean ± SEM. 'n' represents number of flies. For all actograms, white and gray regions represent the light and dark periods, respectively. Source data are provided as a Source Data file.

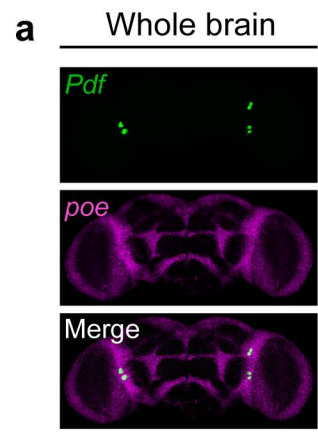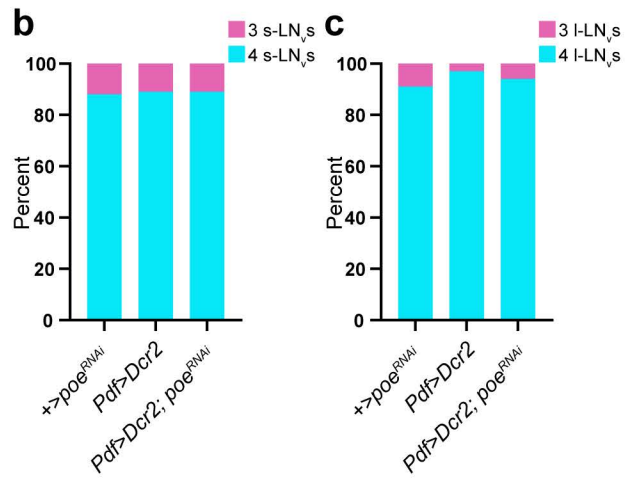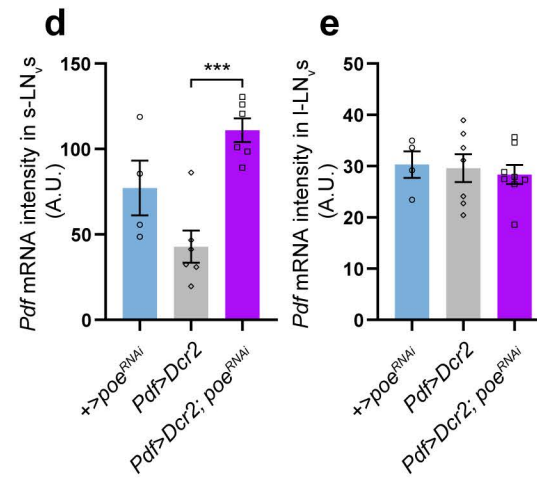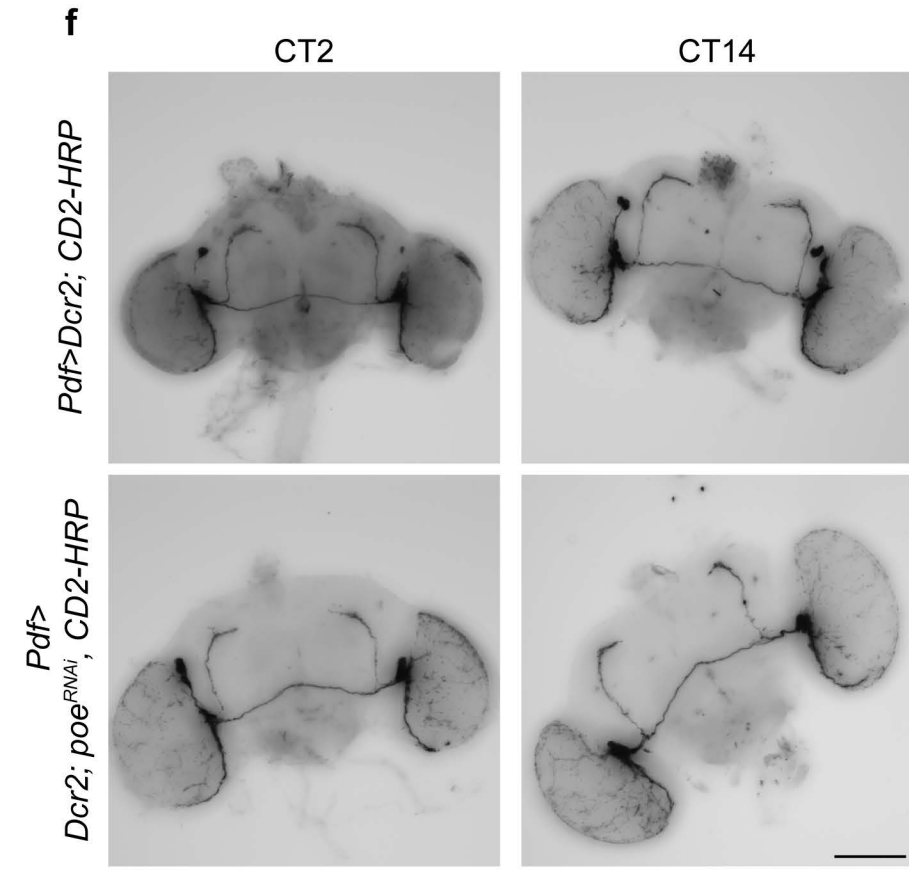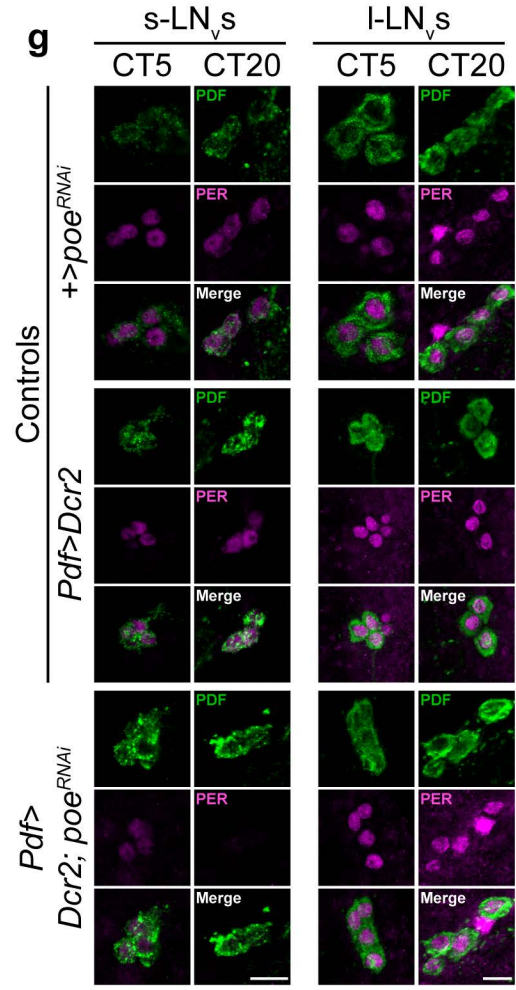

**Supplementary Figure 3. Effects of PDF-specific *poe* knockdown on cell viability, neuronal morphology, and dPER expression in fly clock neurons.** **a** Representative photomicrographs of RNA *in situ* hybridization showing *Pdf* (green) and *poe* (magenta) mRNA expression in the whole fly brain. Scale bar, 60  $\mu$ m. **b, c** Percentage of *Pdf>Dcr2; poe<sup>RNAi</sup>* flies and controls containing either 3 or 4 s-LN<sub>v</sub>s (**b**) or l-LN<sub>v</sub>s (**c**) per hemisphere. n = 35 flies per genotype. Chi-square test. **d, e** Quantification of fluorescence intensity of *Pdf* ISH signal in the s-LN<sub>v</sub>s (**d**) or l-LN<sub>v</sub>s (**e**) of *Pdf>Dcr2; poe<sup>RNAi</sup>* flies and controls at ZT 8. +>*poe<sup>RNAi</sup>*: n = 4, *Pdf>Dcr2*: n = 6 (**d**) or 7 (**e**), *Pdf>Dcr2; poe<sup>RNAi</sup>*: n = 6 (**d**) or 8 (**e**). \*\*\**p* = 0.0007 as indicated; one-way ANOVA with Bonferroni's post hoc. **f** Representative photomicrographs of CD2-HRP expression at CT 2 and CT 14 on DD3 in the whole brain of *Pdf> Dcr2; CD2-HRP* and *Pdf> Dcr2; poe<sup>RNAi</sup>, CD2-HRP* flies. Scale bar, 100  $\mu$ m. **g** Representative photomicrographs of dPER (magenta) and PDF (green) immunofluorescence in the s-LN<sub>v</sub>s (left) and l-LN<sub>v</sub>s (right) of *Pdf>Dcr2; poe<sup>RNAi</sup>* flies and controls at CT 5 and CT 20 on DD3. Scale bar, 10  $\mu$ m. Values represent percent (**b, c**) or mean  $\pm$  SEM (**d, e**). 'n' represents number of flies. A.U., arbitrary units. Source data are provided as a Source Data file.

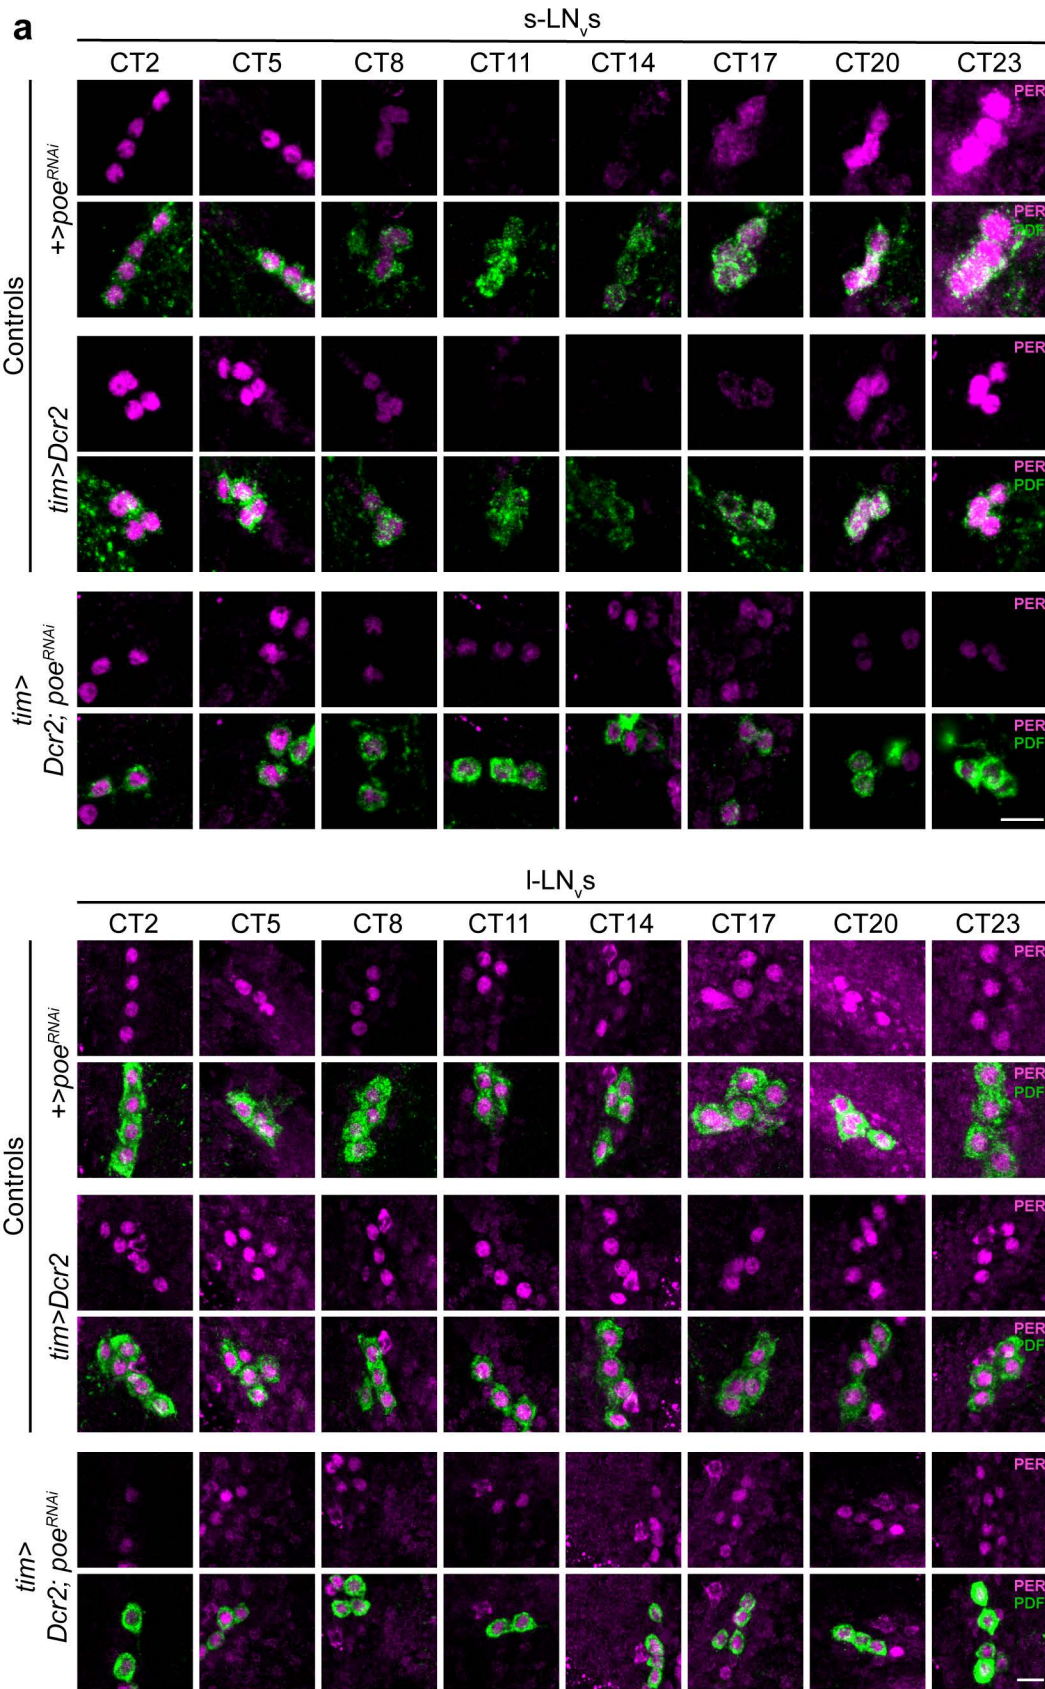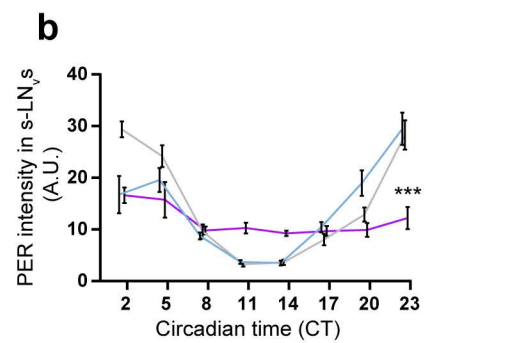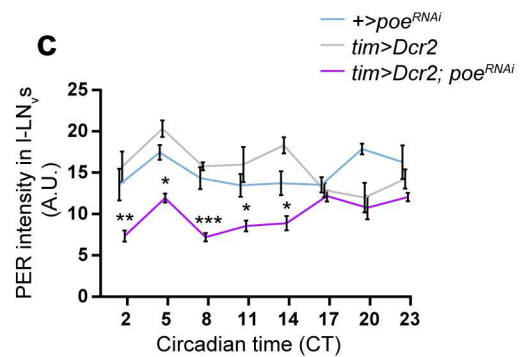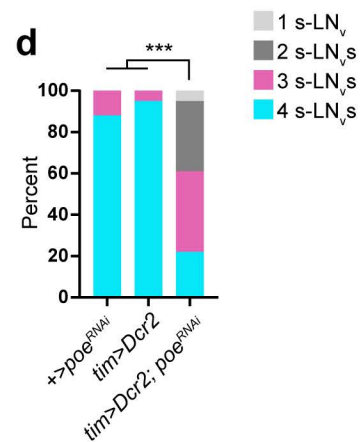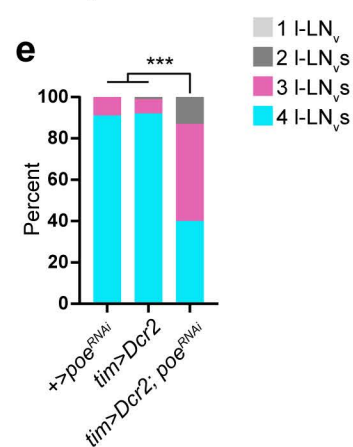

**Supplementary Figure 4. Effects of *tim*-specific *poe* knockdown on dPER expression and cell viability in fly clock neurons.** **a** Representative photomicrographs of dPER (magenta) and PDF (green) immunofluorescence in the s-LN<sub>v</sub>s (top) and l-LN<sub>v</sub>s (bottom) of *tim>Dcr2; poe<sup>RNAi</sup>* flies and controls across the circadian cycle on DD3. Scale bar, 10 μm. **b** Quantification of dPER-IR intensity in the s-LN<sub>v</sub>s of *tim>Dcr2; poe<sup>RNAi</sup>* flies and controls. For each fly, a mean intensity value was calculated by taking the average of all s-LN<sub>v</sub>s that were present in one hemisphere. In ascending order of CT: n = 9, 9, 8, 7, 9, 10, 10, 9 for +>*poe<sup>RNAi</sup>*; n = 7, 8, 10, 9, 9, 10, 9, 11 for *Pdf>Dcr2*; n = 6, 6, 8, 8, 6, 8, 8, 7 for *Pdf>Dcr2; poe<sup>RNAi</sup>*. \*\*\**p* < 0.0001 vs. controls; two-way ANOVA with Bonferroni's post hoc. **c** Quantification of dPER-IR intensity in the l-LN<sub>v</sub>s of *tim>Dcr2; poe<sup>RNAi</sup>* flies and controls, as described above in **(b)**. In ascending order of CT: n = 9, 8, 8, 8, 9, 10, 10, 10 for +>*poe<sup>RNAi</sup>*; n = 7, 9, 9, 9, 9, 9, 9, 10 for *Pdf>Dcr2*; n = 6, 5, 9, 8, 6, 7, 9, 9 for *Pdf>Dcr2; poe<sup>RNAi</sup>*. CT2: \*\**p* = 0.0055, CT5: \**p* = 0.0299, CT8: \*\*\**p* = 0.0003, CT11: \**p* = 0.0268, CT14: \**p* = 0.0429 vs. +>*poe<sup>RNAi</sup>*; two-way ANOVA with Bonferroni's post hoc. **d, e** Percentage of *tim>Dcr2; poe<sup>RNAi</sup>* flies and controls containing either 1, 2, 3, or 4 s-LN<sub>v</sub>s (**d**) or l-LN<sub>v</sub>s (**e**) per hemisphere. +>*poe<sup>RNAi</sup>*: n = 64, *Pdf>Dcr2*: n = 64 (**d**) or 61 (**e**), *Pdf>Dcr2; poe<sup>RNAi</sup>*: n = 64 (**d**) or 62 (**e**). \*\*\**p* < 0.0001 vs. controls; two-sided chi-square test. Values represent mean ± SEM (**b, c**) or percent (**d, e**). 'n' represents number of flies. A.U., arbitrary units. Source data are provided as a Source Data file.



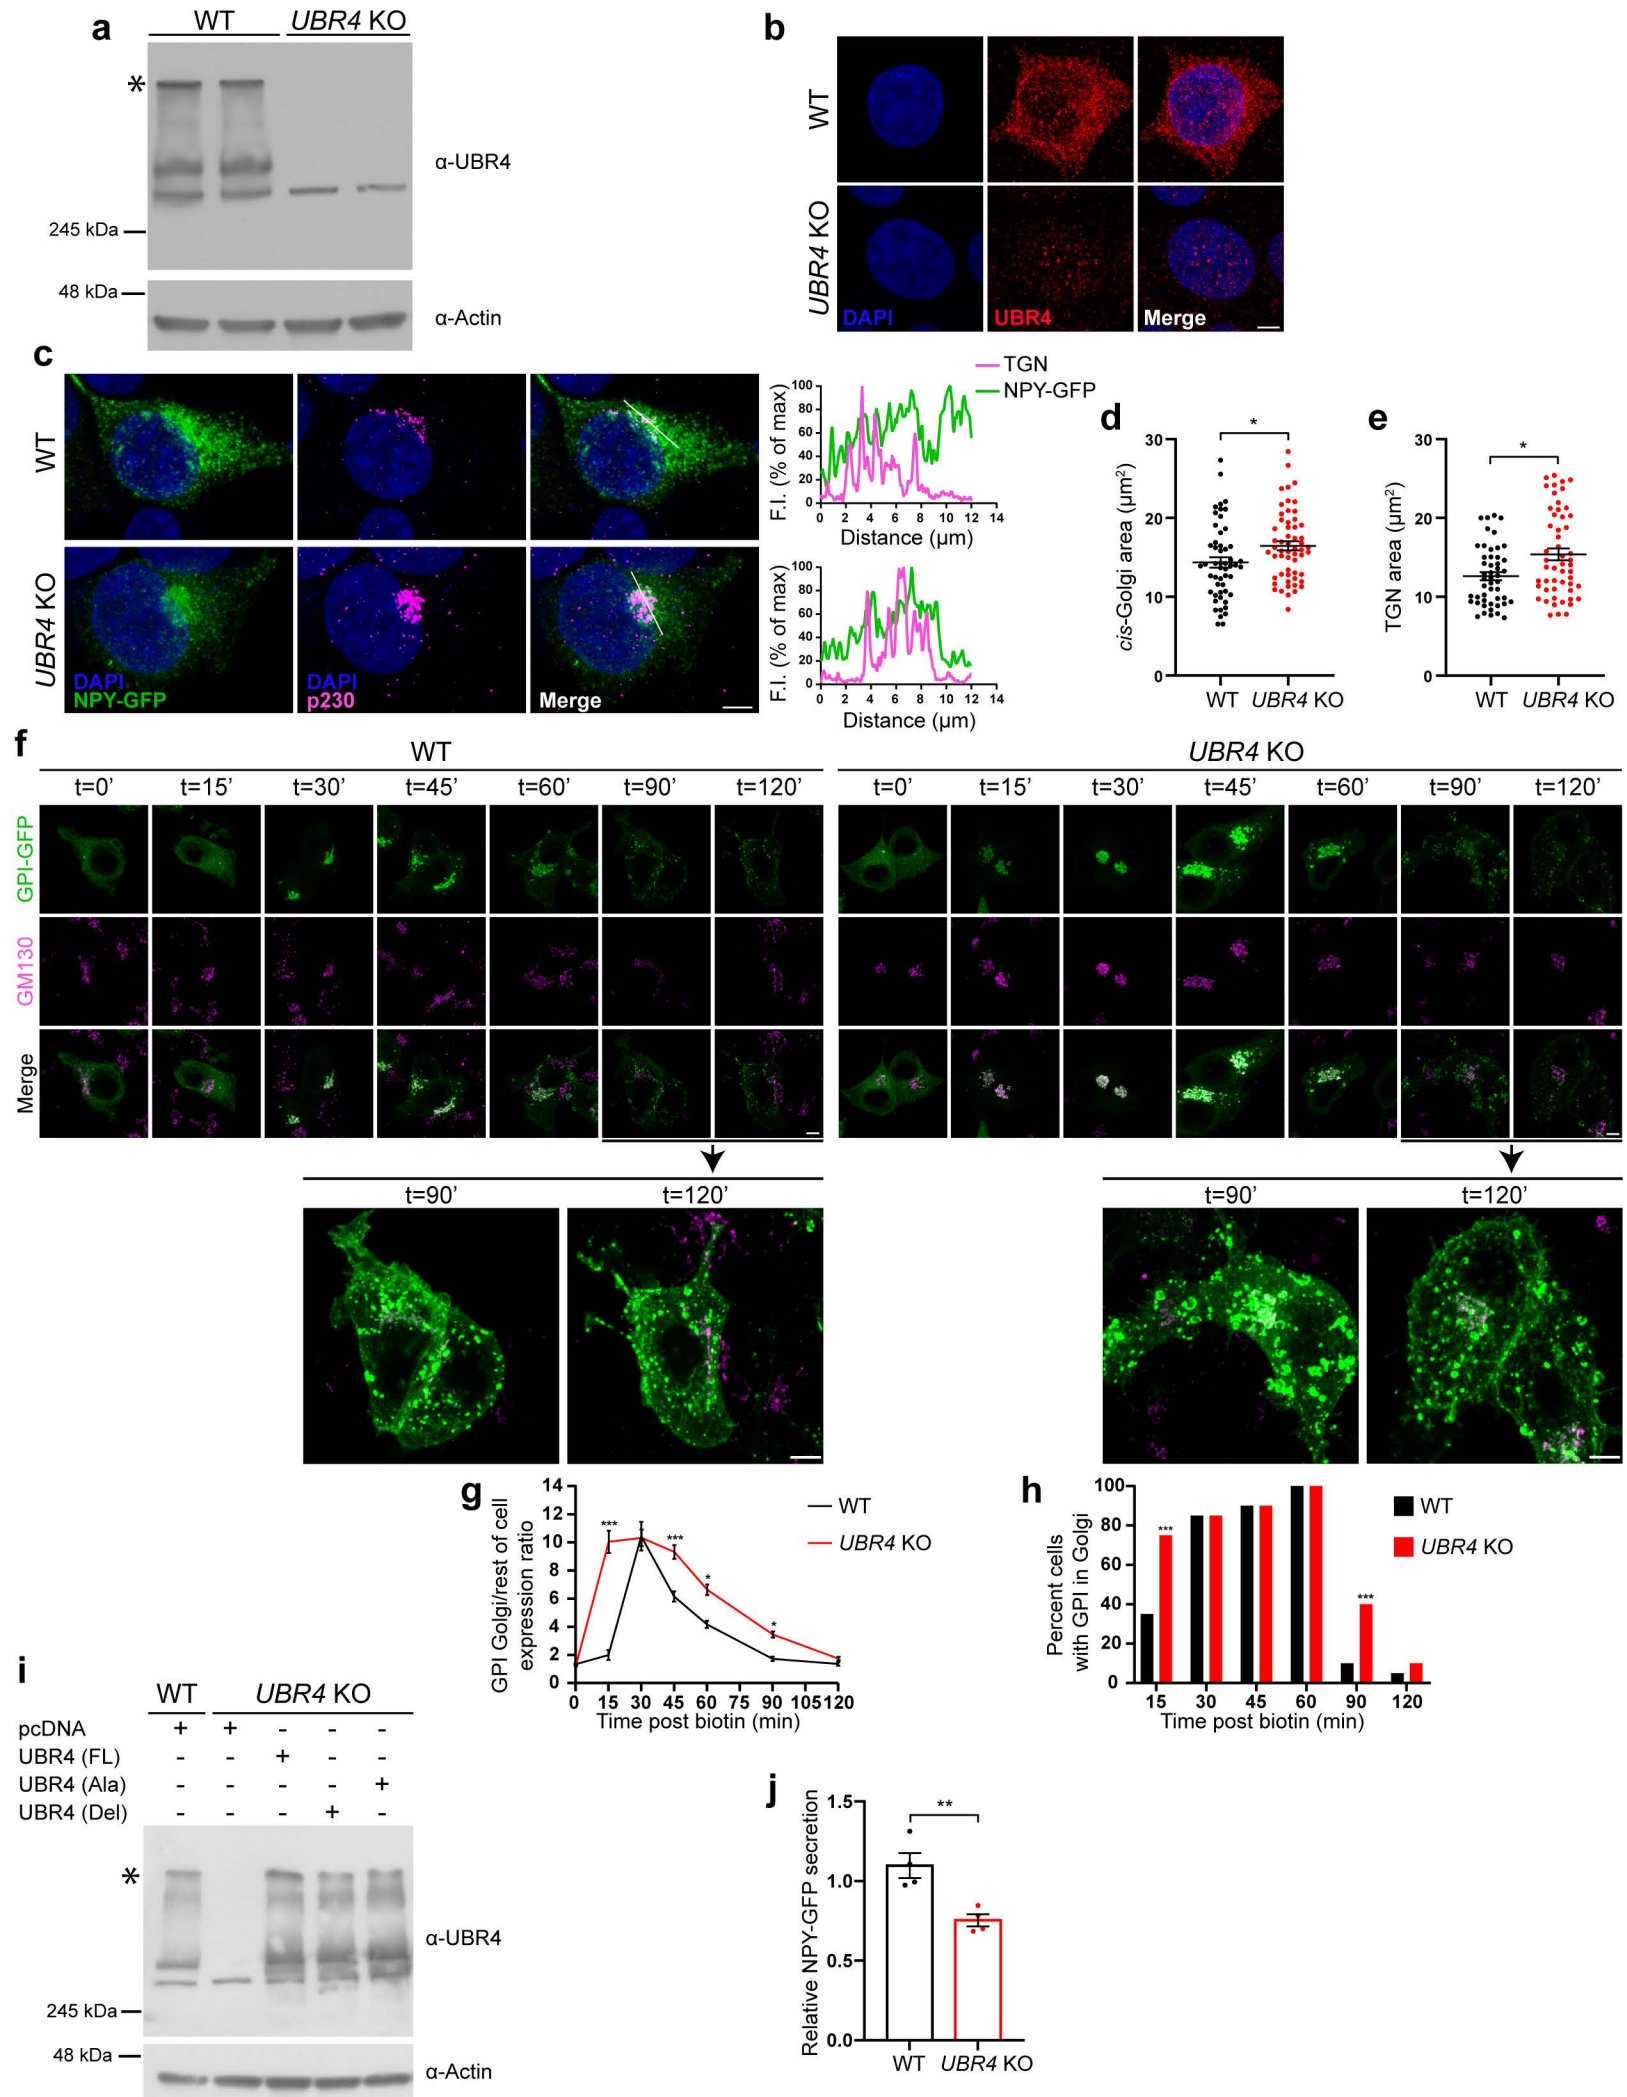

**Supplementary Figure 5. UBR4 depletion impairs cargo transport along the secretory pathway.** **a** Western blot of UBR4 from *UBR4* WT and KO HEK293T cell lysates. Asterisk denotes the full-length UBR4 polypeptide. **b** Representative photomicrographs showing UBR4 immunofluorescence (red) in *UBR4* WT and KO HEK293T cells. DAPI, blue. **c** Representative photomicrographs of transfected *UBR4* WT and KO HEK293T cells showing immunofluorescence of NPY-GFP (green) and the TGN marker, p230 (magenta). Profile plots (right) show NPY-GFP and p230 fluorescence intensity (F.I.) along the reference axis (white line, merged panel). **d** Area of *cis*-Golgi. WT: n = 53, *UBR4* KO: n = 57. \**p* = 0.0141; two-tailed Mann-Whitney U test. **e** Area of TGN. WT: n = 49, *UBR4* KO: n = 53. \**p* = 0.0133; two-tailed Mann-Whitney U test. **f** Representative photomicrographs showing the trafficking of GPI-GFP (green) in *UBR4* WT and KO HEK293T cells using the RUSH assay. Cells were fixed at the indicated time points post-biotin and CHX addition, and immunostained for GPI-GFP and GM130 (magenta). Images for t=90' and t=120' are presented at higher magnification to show the preponderance of large GPI-GFP<sup>+</sup> vesicles that appeared in the cytoplasm of *UBR4* KO cells at these time points. **g** Ratio of GPI-GFP abundance in the Golgi relative to the rest of the cell at specified time points post-biotin addition in the RUSH experiment. In ascending order of time post-biotin addition (t): n = 20, 20, 26, 40, 15, 24, 14 for WT; n = 20, 25, 29, 31, 17, 41, 27 for *UBR4* KO. t = 60min: \**p* = 0.0308, t = 90min: \**p* = 0.0409, \*\*\**p*<0.0001 vs. WT; two-way ANOVA with Bonferroni's post hoc. **h** Percentage of cells with GPI-GFP localization in the Golgi of *UBR4* WT and KO HEK293T cells at specified time points post-biotin addition in the RUSH experiment. \*\*\**p*<0.0001 vs. WT; two-tailed chi-square test. **i** Western blot of UBR4 from *UBR4* WT and KO HEK293T cell lysates transfected with the plasmids: empty vector (pcDNA), UBR4 (FL), UBR4 (Ala), or UBR4 (Del). Asterisk denotes the full-length UBR4 polypeptide. **j** Relative NPY-GFP secretion from *UBR4* WT and KO HEK293T cells assayed via ELISA. n = 4 per genotype. \*\**p* = 0.0074; two-tailed unpaired t-test. Values represent mean ± SEM (**d**, **e**, **g**, **j**) or percent (**h**). 'n' represents number of cells (**d**, **e**, **g**) or samples (**j**). Scale bar, 5 μm. Source data are provided as a Source Data file.

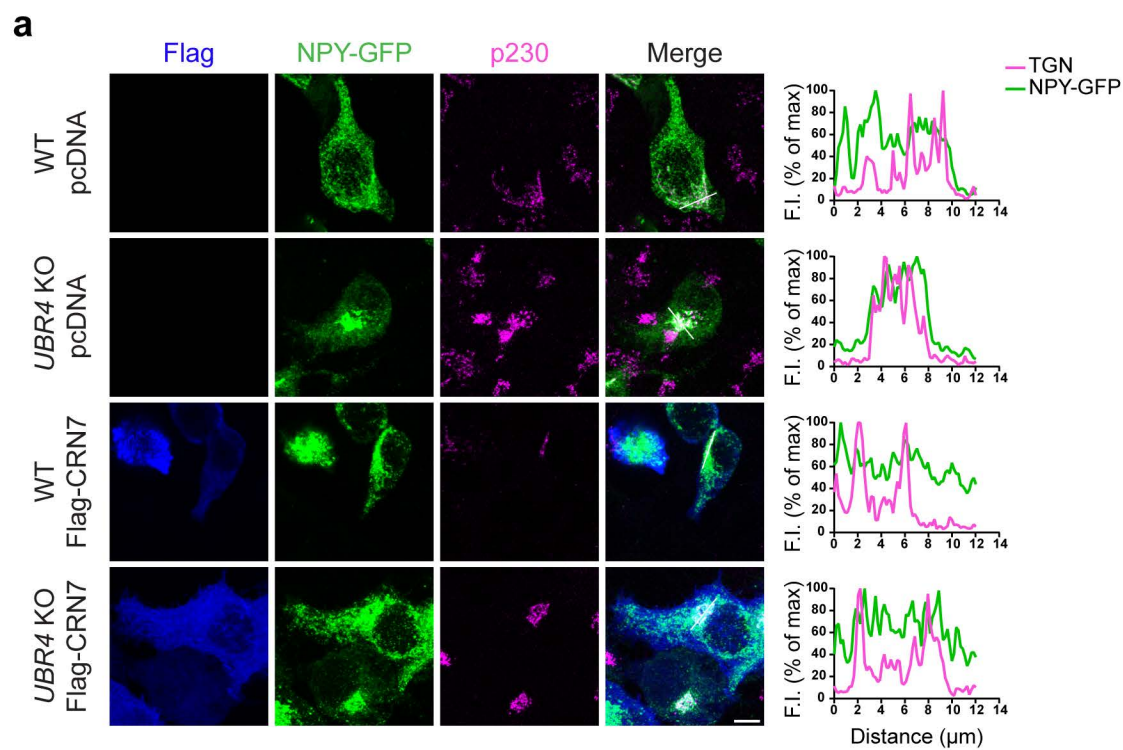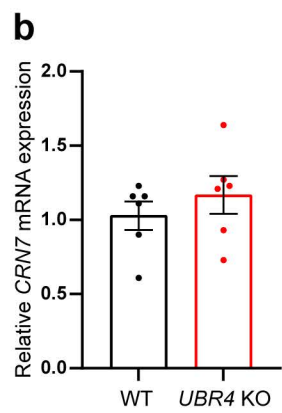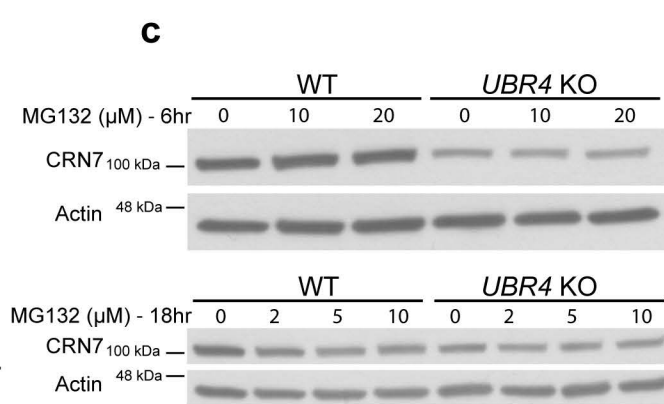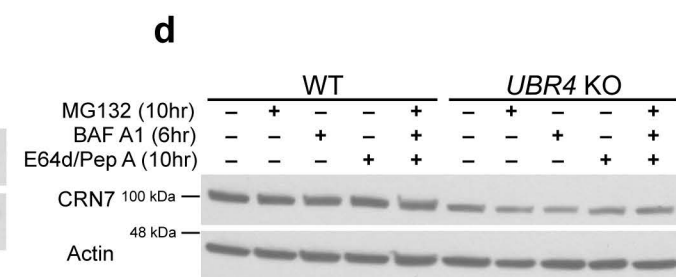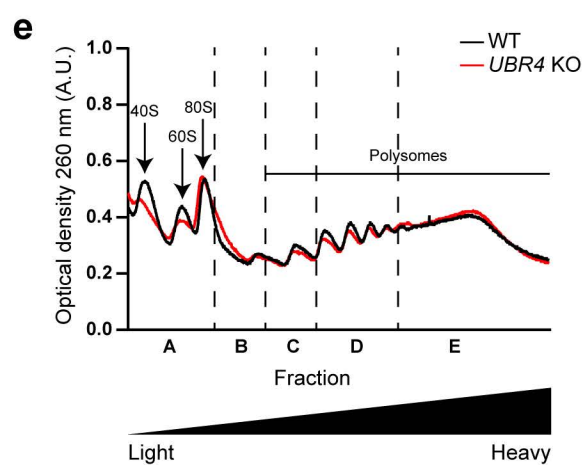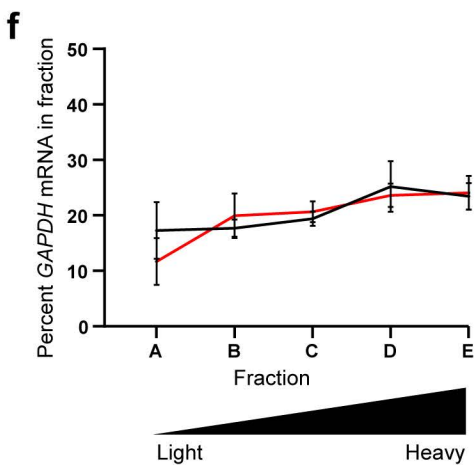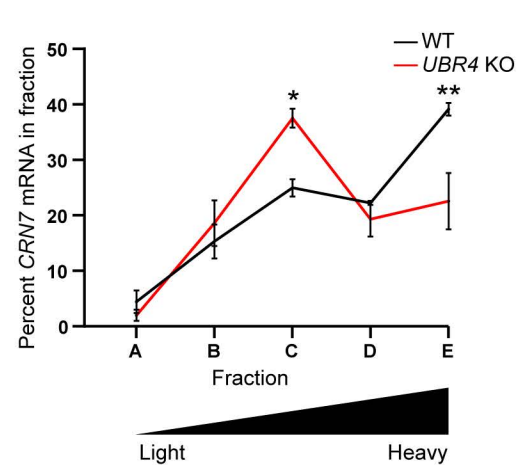

**Supplementary Figure 6. Overexpression of Coronin 7 rescues the retention of NPY-GFP in the Golgi of *UBR4* KO cells.** **a** Representative photomicrographs of NPY-GFP (green) immunofluorescence in *UBR4* WT and KO HEK293T cells transfected with either pcDNA empty vector or Flag-CRN7 (blue). p230, magenta. Profile plots (right) show NPY-GFP and p230 fluorescence intensity (F.I.) along the reference axis (white line, merged panel). Scale bar, 10  $\mu$ m. **b** qRT-PCR analysis of relative *CRN7* mRNA expression in untransfected *UBR4* WT and KO HEK293T cells. *GAPDH* was used as the normalization control. n = 6 samples per group; two-tailed unpaired t-test. **c, d** Western blot of endogenous CRN7 following treatment of *UBR4* WT and KO HEK293T cells with vehicle (DMSO, 0 $\mu$ M MG132) or MG132 at the indicated concentrations for 6 hours (top) or 18 hours (bottom) (**c**), or with MG132 (10 $\mu$ M), Bafilomycin A1 (500nM), and/or E64d plus Pepstatin A (10 $\mu$ g/mL each) for the indicated duration (**d**). **e** Polysome profiles of untransfected *UBR4* WT and KO HEK293T cells. Positions of the 40S, 60S, and 80S ribosome peaks and polysomes are indicated. A.U., arbitrary units. **f** qRT-PCR analysis showing levels of *GAPDH* and *CRN7* mRNA extracted from polysome fractions of *UBR4* WT and KO HEK293T cells. n = 3 samples per group. \**p* = 0.0233, \*\**p* = 0.0063 vs. WT; two-way ANOVA. All values represent mean  $\pm$  SEM. Source data are provided as a Source Data file.

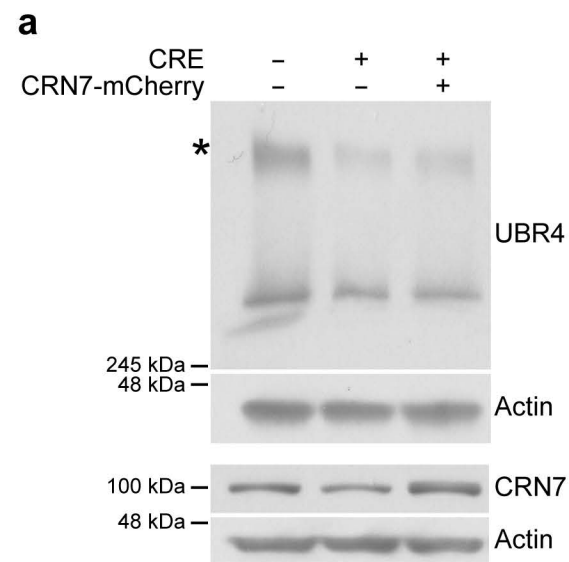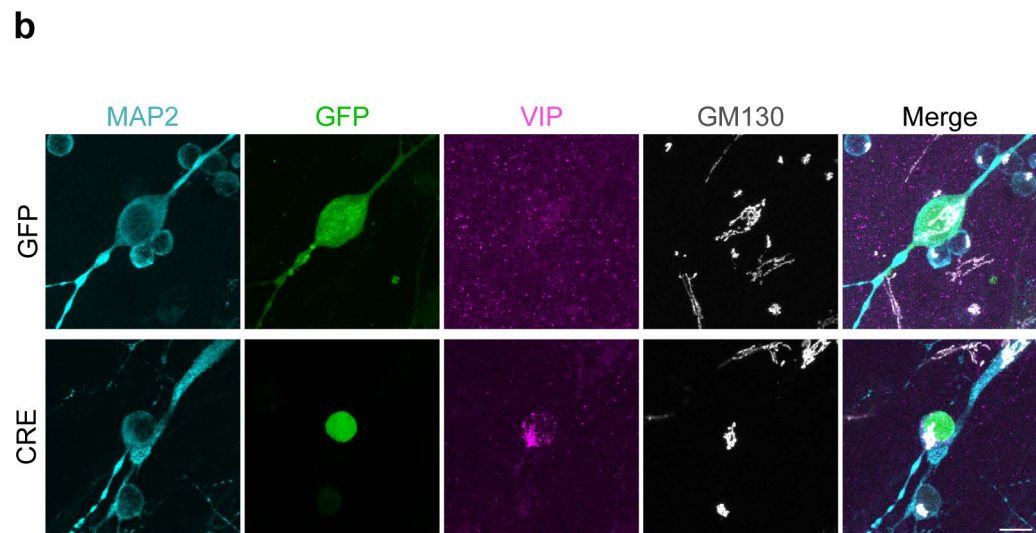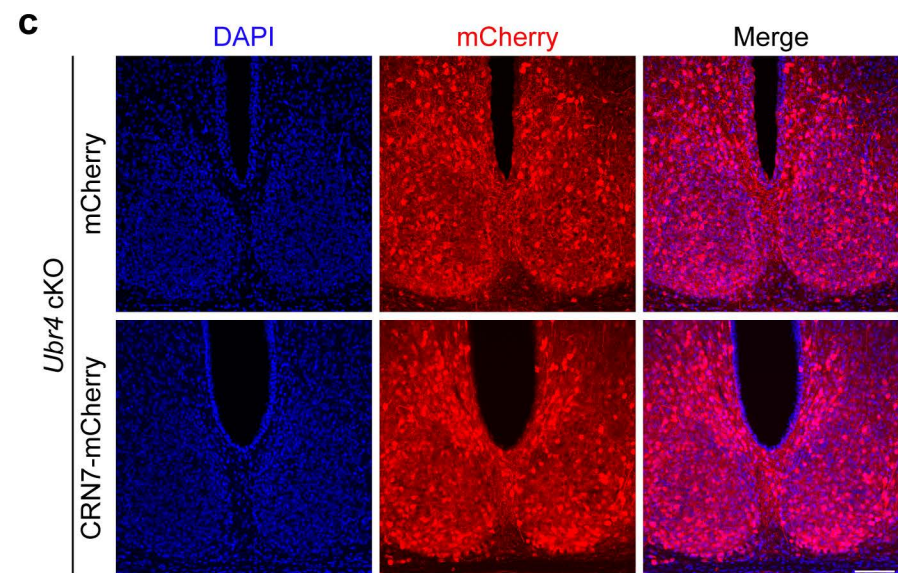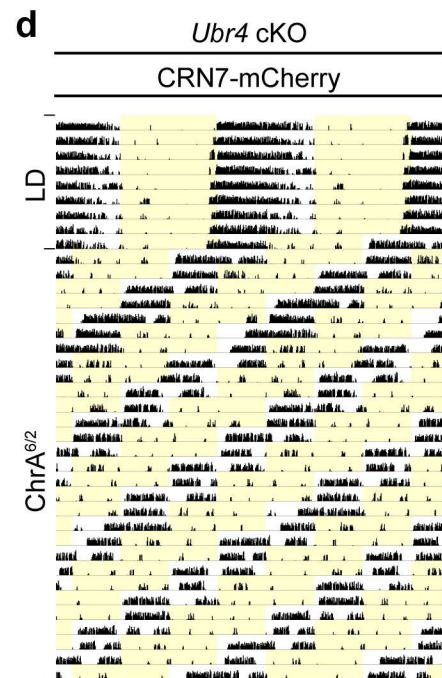

**Supplementary Figure 7. The effects of *Ubr4* ablation on VIP trafficking in SCN neuronal cultures and SCN-targeted overexpression of *Crn7* on circadian behavior.** **a** Western blot of UBR4 and CRN7 from *Ubr4<sup>fl/fl</sup>* SCN neuronal cultures that had been transduced with the indicated AAV1 vectors. Asterisk denotes the full-length UBR4 polypeptide. Similar results were obtained from 2 independent experiments. **b** Representative photomicrographs showing endogenous VIP (magenta) expression in *Ubr4<sup>fl/fl</sup>* SCN neuronal cultures that had been transduced with AAVs expressing either GFP (AAV1-hSyn-eGFP (GFP)) or Cre-recombinase (AAV1-hSyn-Cre-eGFP (CRE)). Cells were co-immunostained for MAP2 (cyan), GFP (green), and GM130 (gray). Scale bar, 10  $\mu$ m. Similar results were obtained from 3 independent experiments. **c** Representative photomicrographs of mCherry immunoreactivity (red) in the SCN of *Ubr4* cKO mice following SCN injections of either AAV1-CMV-mCherry (mCherry) or AAV1-CMV-m-Coronin7-2A-mCherry (CRN7-mCherry). DAPI, blue. Scale bar, 100  $\mu$ m. mCherry: n = 9 mice, CRN7-mCherry: n = 8 mice. **d** A representative double-plotted actogram showing wheel-running activity of an “entrained” *Ubr4* cKO mouse under the chronic jetlag (ChrA<sup>6/2</sup>) paradigm. This animal had received a bilateral injection of AAV1-CMV-m-Coronin7-2A-mCherry (CRN7-mCherry) into the SCN.

**Supplementary Table 1. Wheel-running behavioral parameters in control and *Ubr4* cKO mice.**

| Parameter                                        | Photoperiod                                      | Control                                         |                  | <i>Ubr4</i> cKO                                 |                  | P-value          |       |        |
|--------------------------------------------------|--------------------------------------------------|-------------------------------------------------|------------------|-------------------------------------------------|------------------|------------------|-------|--------|
|                                                  |                                                  | Mean ± SEM                                      | N                | Mean ± SEM                                      | N                |                  |       |        |
| Daily wheel revolutions                          | LD                                               | 5299.28 ± 659.67                                | 11               | 3482.43 ± 451.81                                | 13               | 0.0638           |       |        |
|                                                  | DD                                               | 5626.60 ± 733.64                                | 11               | 4411.69 ± 503.81                                | 12               | 0.2777           |       |        |
|                                                  | <sup>a</sup> LL-5 Lux                            | 4163.71 ± 715.99                                | 11               | 1620.03 ± 247.36                                | 11               | <0.0001***       |       |        |
|                                                  | <sup>a</sup> LL-10 Lux                           | 2672.46 ± 357.56                                | 10               | 1107.13 ± 120.09                                | 11               | 0.0062**         |       |        |
|                                                  | <sup>a</sup> LL-20 Lux                           | 2747.47 ± 448.92                                | 11               | 825.48 ± 97.62                                  | 11               | 0.0026**         |       |        |
|                                                  | <sup>a</sup> LL-40 Lux                           | 2602.1 ± 539.25                                 | 11               | 613.76 ± 131.19                                 | 11               | 0.0017**         |       |        |
|                                                  | <sup>a</sup> LL-80 Lux                           | 2092.22 ± 438.71                                | 11               | 522.15 ± 141.11                                 | 11               | 0.0227*          |       |        |
|                                                  | LL-120 Lux                                       | 1366.16 ± 299.79                                | 8                | 437.37 ± 110.57                                 | 8                | 0.0692           |       |        |
|                                                  | <sup>a</sup> ChrA <sup>6/2</sup> jetlag          | 5441.09 ± 276.32                                | 8                | 2553.16 ± 178.61                                | 11               | <0.0001***       |       |        |
|                                                  | <sup>a</sup> DD- post ChrA <sup>6/2</sup> jetlag | 6196.26 ± 170.09                                | 7                | 2258.24 ± 248.53                                | 11               | <0.0001***       |       |        |
| Amplitude (χ <sup>2</sup> Amplitude)             | LD                                               | 893.71 ± 60.30                                  | 11               | 740.61 ± 32.59                                  | 11               | 0.3410           |       |        |
|                                                  | DD                                               | 1129.73 ± 98.42                                 | 11               | 1078.33 ± 87.77                                 | 13               | >0.9999          |       |        |
|                                                  | LL-5 Lux                                         | 1210.83 ± 153.65                                | 11               | 948.11 ± 86.00                                  | 11               | >0.9999          |       |        |
|                                                  | LL-10 Lux                                        | 1181.53 ± 178.09                                | 11               | 1230.57 ± 194.78                                | 11               | >0.9999          |       |        |
|                                                  | LL-20 Lux                                        | 1073.24 ± 129.64                                | 10               | 881.09 ± 111.22                                 | 10               | >0.9999          |       |        |
|                                                  | <sup>a</sup> LL-40 Lux                           | 1173.55 ± 139.60                                | 10               | 675.27 ± 67.12                                  | 11               | 0.0277*          |       |        |
|                                                  | <sup>a</sup> LL-80 Lux                           | 1522.62 ± 195.44                                | 11               | 650.75 ± 75.89                                  | 11               | 0.0001***        |       |        |
|                                                  | LL-120 Lux                                       | 953.87 ± 138.46                                 | 8                | 677.29 ± 80.02                                  | 8                | 0.6914           |       |        |
|                                                  | ChrA <sup>6/2</sup> jetlag                       | 21 hr component                                 | 1884.50 ± 258.93 | 9/9                                             | 21 hr component  | 1757.50 ± 189.78 | 13/13 | 0.6896 |
|                                                  |                                                  | >24 hr component                                | 783.70 ± 71.58   | 5/9                                             | >24 hr component | NA               | 0/13  | NA     |
| <sup>a</sup> DD- post ChrA <sup>6/2</sup> jetlag | 2017.07 ± 110.67                                 | 8                                               | 1234.37 ± 126.97 | 12                                              | 0.0004***        |                  |       |        |
| FFT Amplitude                                    | LD                                               | 1.48 x10 <sup>-2</sup> ± 1.41 x10 <sup>-3</sup> | 11               | 1.45 x10 <sup>-2</sup> ± 1.20 x10 <sup>-3</sup> | 12               | >0.9999          |       |        |
|                                                  | DD                                               | 0.0124 ± 1.49x10 <sup>-3</sup>                  | 11               | 0.0136 ± 1.17 x10 <sup>-3</sup>                 | 13               | 0.9824           |       |        |
|                                                  | LL-5 Lux                                         | 7.00x10 <sup>-3</sup> ± 1.00x10 <sup>-3</sup>   | 11               | 5.00 x10 <sup>-3</sup> ± 6.00 x10 <sup>-4</sup> | 11               | 0.5081           |       |        |
|                                                  | LL-10 Lux                                        | 6.00x10 <sup>-3</sup> ± 1.00x10 <sup>-3</sup>   | 11               | 5.00 x10 <sup>-3</sup> ± 5.00 x10 <sup>-4</sup> | 11               | 0.9097           |       |        |
|                                                  | LL-20 Lux                                        | 6.00x10 <sup>-3</sup> ± 1.00x10 <sup>-3</sup>   | 11               | 4.00x10 <sup>-3</sup> ± 4.00 x10 <sup>-4</sup>  | 11               | 0.3880           |       |        |
|                                                  | <sup>a</sup> LL-40 Lux                           | 6.00x10 <sup>-3</sup> ± 1.00x10 <sup>-3</sup>   | 11               | 3.00x10 <sup>-3</sup> ± 3.00 x10 <sup>-4</sup>  | 11               | 0.0076**         |       |        |
|                                                  | LL-80 Lux                                        | 3.00x10 <sup>-3</sup> ± 4.67x10 <sup>-4</sup>   | 10               | 2.00x10 <sup>-3</sup> ± 3.00 x10 <sup>-4</sup>  | 11               | 0.2066           |       |        |
|                                                  | LL-120 Lux                                       | 5.00x10 <sup>-3</sup> ± 1.00x10 <sup>-3</sup>   | 8                | 3.00x10 <sup>-3</sup> ± 5.00 x10 <sup>-4</sup>  | 8                | 0.0764           |       |        |
|                                                  | ChrA <sup>6/2</sup> jetlag                       | 4.26 x10 <sup>-3</sup> ± 3.78x10 <sup>-4</sup>  | 9                | 4.41x10 <sup>-3</sup> ± 2.28x10 <sup>-4</sup>   | 12               | >0.9999          |       |        |
|                                                  | <sup>a</sup> DD- post ChrA <sup>6/2</sup> jetlag | 7.75 x10 <sup>-3</sup> ± 7.07 x10 <sup>-4</sup> | 8                | 6.25x10 <sup>-3</sup> ± 4.15x10 <sup>-4</sup>   | 11               | 0.0327*          |       |        |
| <sup>b</sup> Period length (hr)                  | DD                                               | 23.63 ± 0.06                                    | 11               | 23.60 ± 0.04                                    | 13               | 0.6652           |       |        |
|                                                  | LL-5 Lux                                         | 24.85 ± 0.16                                    | 11               | 24.29 ± 0.07                                    | 11               | 0.1160           |       |        |
|                                                  | <sup>a</sup> LL-10 Lux                           | 25.38 ± 0.20                                    | 10               | 24.37 ± 0.09                                    | 11               | 0.0003***        |       |        |
|                                                  | <sup>a</sup> LL-20 Lux                           | 25.43 ± 0.20                                    | 10               | 24.67 ± 0.15                                    | 9                | 0.0048**         |       |        |
|                                                  | <sup>a</sup> LL-40 Lux                           | 25.71 ± 0.22                                    | 11               | 24.63 ± 0.19                                    | 10               | <0.0001***       |       |        |
|                                                  | LL-80 Lux                                        | 25.8 ± 0.22                                     | 11               | 25.4 ± 0.24                                     | 7                | >0.9999          |       |        |

|                             |                                     |              |    |              |    |        |
|-----------------------------|-------------------------------------|--------------|----|--------------|----|--------|
| Period length (hr) (cont'd) | LL-120 Lux                          | 26.23 ± 0.11 | 7  | 25.5 ± 0.19  | 6  | 0.8516 |
|                             | DD- post ChrA <sup>6/2</sup> jetlag | 23.50 ± 0.09 | 8  | 23.61 ± 0.03 | 12 | 0.2118 |
| Phase angle                 | LD                                  | 0.35 ± 0.09  | 10 | 0.34 ± 0.1   | 12 | 0.9493 |

<sup>a</sup>  $p < 0.05$ , <sup>\*\*</sup>  $p < 0.01$ , <sup>\*\*\*</sup>  $p < 0.001$  by linear mixed effects modelling.

<sup>b</sup> excludes all arrhythmic animals in LL.

### Supplementary Table 2. Summary of fly locomotor activity parameters using the *tim*-GAL4 driver.

| Parameter                       | Photoperiod | $+>poe^{RNAi}$               |    | <i>tim&gt;Dcr2</i>            |    | <i>tim&gt; Dcr2; poe^{RNAi}</i> |    | P-value                                                                    |
|---------------------------------|-------------|------------------------------|----|-------------------------------|----|---------------------------------|----|----------------------------------------------------------------------------|
|                                 |             | Mean ± SEM                   | N  | Mean ± SEM                    | N  | Mean ± SEM                      | N  |                                                                            |
| Daily locomotor activity counts | LD          | 435.8 ± 30.33                | 15 | 1005 ± 50.72                  | 31 | 828.4 ± 42.69                   | 31 | <sup>b</sup> < 0.0001 <sup>***</sup><br><sup>c</sup> 0.0152*               |
|                                 | DD          | 378.4 ± 28.24                | 14 | 1047 ± 58.05                  | 32 | 501.1 ± 25.78                   | 30 | <sup>b</sup> 0.2914<br><sup>c</sup> < 0.0001 <sup>***</sup>                |
| FFT power                       | LD          | 0.12 ± 7.46x10 <sup>-3</sup> | 15 | 0.11 ± 9.32 x10 <sup>-3</sup> | 32 | 0.07 ± 4.22x10 <sup>-3</sup>    | 30 | <sup>b</sup> < 0.0001 <sup>***</sup><br><sup>c</sup> 0.0004 <sup>***</sup> |
|                                 | DD          | 0.04 ± 5.3x10 <sup>-3</sup>  | 14 | 0.05 ± 5.3x10 <sup>-3</sup>   | 31 | 0.01 ± 7.20x10 <sup>-4</sup>    | 31 | <sup>b</sup> < 0.0001 <sup>***</sup>                                       |
| <sup>a</sup> Period length (h)  | DD          | 23.90 ± 0.03                 | 14 | 24.17 ± 0.057                 | 29 | NA                              | NA | NA                                                                         |

<sup>a</sup> excludes all arrhythmic flies.

<sup>b</sup> indicates p-value relative to  $+>poe^{RNAi}$  control.

<sup>c</sup> indicates p-value relative to *tim>Dcr2* control.

\* $p < 0.05$ , <sup>\*\*\*</sup>  $p < 0.001$  by one-way ANOVA with Bonferroni's post hoc test (LD activity), or Kruskal-Wallis with Dunn's post hoc test (DD activity, FFT power).

### Supplementary Table 3. Summary of fly locomotor activity parameters using the *Pdf*-GAL4 driver.

| Parameter                                    | Photo-period    | $+>poe^{RNAi}$                       |    | <i>Pdf&gt;Dcr2</i>            |    | <i>Pdf&gt; Dcr2; poe^{RNAi}</i> |     | P-value                                                                                  |
|----------------------------------------------|-----------------|--------------------------------------|----|-------------------------------|----|---------------------------------|-----|------------------------------------------------------------------------------------------|
|                                              |                 | Mean ± SEM                           | N  | Mean ± SEM                    | N  | Mean ± SEM                      | N   |                                                                                          |
| <sup>e</sup> Daily locomotor activity counts | LD              | 361.40 ± 15.55                       | 31 | 712.2 ± 30.26                 | 30 | 477 ± 15.74                     | 62  | <sup>b</sup> 0.0002 <sup>***</sup><br><sup>c</sup> < 0.0001 <sup>***</sup>               |
|                                              | DD              | 254.4 ± 14.13                        | 30 | 591.6 ± 40.68                 | 30 | 555.5 ± 16.36                   | 104 | <sup>b</sup> < 0.0001 <sup>***</sup><br><sup>c</sup> 0.8915                              |
| FFT power                                    | <sup>e</sup> LD | 0.08 ± 5.95x10 <sup>-3</sup>         | 31 | 0.11 ± 7.18x10 <sup>-3</sup>  | 30 | 0.08 ± 3.56x10 <sup>-3</sup>    | 108 | <sup>b</sup> > 0.9999 <sup>c</sup> 0.0133*                                               |
|                                              | DD              | All: 0.032 ± 7.54x10 <sup>-3</sup>   | 32 | 0.023 ± 1.82x10 <sup>-3</sup> | 29 | 0.012 ± 6.92x10 <sup>-4</sup>   | 108 | <sup>b</sup> < 0.0001 <sup>***</sup>                                                     |
|                                              |                 | Early: 0.034 ± 2.28x10 <sup>-3</sup> | 30 | 0.030 ± 2.11x10 <sup>-3</sup> | 28 | 0.035 ± 2.07x10 <sup>-3</sup>   | 104 | <sup>b</sup> > 0.9999<br><sup>cd</sup> 0.5289,<br><sup>bcd</sup> < 0.0001 <sup>***</sup> |
| <sup>a</sup> Period length (h)               | DD              | 23.77 ± 0.03                         | 29 | 24.28 ± 0.03                  | 25 | Unstable period                 | 14  | NA                                                                                       |

<sup>a</sup> excludes all arrhythmic flies.

<sup>b</sup> indicates p-value relative to  $+>poe^{RNAi}$  control.

<sup>c</sup> indicates p-value relative to *Pdf>Dcr2* control.

<sup>d</sup> \* $p < 0.05$ , <sup>\*\*\*</sup>  $p < 0.001$  by linear mixed effects modelling with Bonferroni's post hoc test.

<sup>e</sup> \* $p < 0.05$ , <sup>\*\*\*</sup>  $p < 0.001$  by one-way ANOVA with Bonferroni's post hoc test (Activity, FFT power - LD) or Kruskal-Wallis with Dunn's post hoc test (FFT power - DD All).



**Supplementary Table 4. Details of Experimental Reagents and Resources.**

| REAGENT or RESOURCE                                                                                | SOURCE                      | IDENTIFIER                         |
|----------------------------------------------------------------------------------------------------|-----------------------------|------------------------------------|
| Antibodies (and the dilution it was used at)                                                       |                             |                                    |
| Rabbit anti-UBR4 (1:1000)                                                                          | Abcam                       | Cat# ab86738; RRID: AB_1952666     |
| Rabbit anti-Actin (1:15K)                                                                          | Sigma                       | Cat# A2066; RRID: AB_476693        |
| Rabbit anti-Arginine Vasopressin (AVP) (1:30K)                                                     | Sigma                       | Cat# AB1565; RRID: AB_90782        |
| Rabbit anti-Vasoactive Intestinal Peptide (VIP) (1:1000 and 1:10K)                                 | ImmunoStar                  | Cat# 20077; RRID: AB_572270        |
| Rabbit anti-PERIOD2 (1:30K)                                                                        | Gift from D. Weaver         | N/A                                |
| Rabbit anti-Coronin 7 (1:10K and 1:20K)                                                            | Abcam                       | Cat# ab117446; RRID: AB_10902520   |
| Guinea Pig anti-Cre-Recombinase (1:1000)                                                           | Synaptic Systems            | Cat# 257004; RRID:AB_2782969       |
| Rabbit anti-FLAG (1:2000)                                                                          | Abcam                       | Cat# ab1162; RRID: AB_298215       |
| Mouse anti-GM130 (1:2000)                                                                          | BD Biosciences              | Cat# 610822; RRID: AB_398141       |
| Mouse anti-P230 (1:2000)                                                                           | BD Biosciences              | Cat# 611280; RRID: AB_398808       |
| Chicken anti-MAP2 (1:1000)                                                                         | Abcam                       | Cat# ab5392; RRID: AB_2138153      |
| Goat anti-Green Fluorescent Protein (GFP) (1:5000)                                                 | Eusera                      | Cat# EU3                           |
| Mouse anti-V5 (1:2000)                                                                             | Abcam                       | Cat# ab27671; RRID: AB_471093      |
| Rat anti-mCherry (1:5000)                                                                          | Thermo Fisher Scientific    | Cat# M11217; RRID:AB_2536611       |
| Goat anti-Rabbit IgG Secondary Antibody, HRP conjugate (1:100K)                                    | Thermo Fisher Scientific    | Cat# 31460; RRID: AB_228341        |
| Biotinylated goat anti-Rabbit IgG (1:300)                                                          | Vector Laboratories         | Cat# BA-1000; RRID: AB_2313606     |
| Donkey anti-Goat IgG (H+L) Highly Cross-Adsorbed Secondary Antibody, Alexa Fluor Plus 488 (1:1000) | Thermo Fisher Scientific    | Cat# A32814; RRID: AB_2762838      |
| Donkey anti-Rabbit IgG (H+L) Highly Cross-Adsorbed Secondary Antibody, Alexa Fluor 594 (1:1000)    | Thermo Fisher Scientific    | Cat# A-21207; RRID: AB_141637      |
| Donkey anti-Rabbit IgG (H+L) Highly Cross-Adsorbed Secondary Antibody, Alexa Fluor 488 (1:100)     | Thermo Fisher Scientific    | Cat# A-21206; RRID:AB_2535792      |
| Donkey anti-Mouse IgG (H+L) Highly Cross-Adsorbed Secondary Antibody, Alexa Fluor 594 (1:1000)     | Thermo Fisher Scientific    | Cat# A-21203; RRID: AB_2535789     |
| Donkey anti-Mouse IgG (H+L) Highly Cross-Adsorbed Secondary Antibody, Alexa Fluor 647 (1:1000)     | Thermo Fisher Scientific    | Cat# A-31571; RRID: AB_162542      |
| Donkey anti-Rat IgG (H+L) Highly Cross-Adsorbed Secondary Antibody, Alexa Fluor 594 (1:1000)       | Thermo Fisher Scientific    | Cat# A-21209; RRID: AB_2535795     |
| DyLight 405 AffiniPure Donkey Anti-Chicken IgY (IgG) (H+L) (1:1000)                                | Jackson ImmunoResearch Labs | Cat# 703-475-155; RRID: AB_2340373 |
| DyLight 405 AffiniPure Donkey Anti-Guinea Pig IgG (H+L) (1:1000)                                   | Jackson ImmunoResearch Labs | Cat# 706-475-148; RRID: AB_2340470 |
| DyLight 405 AffiniPure Donkey Anti-Rabbit IgG (H+L) (1:1000)                                       | Jackson ImmunoResearch Labs | Cat# 711-475-152; RRID: AB_2340616 |

|                                                                        |                             |                                    |
|------------------------------------------------------------------------|-----------------------------|------------------------------------|
| Alexa Fluor 594 AffiniPure Donkey Anti-Guinea Pig IgG (H+L) (1:1000)   | Jackson ImmunoResearch Labs | Cat# 706-585-148; RRID: AB_2340474 |
| Rabbit anti-Pigment Dispersing Factor (PDF) (1:20K)                    | Gift from M. Nitabach       | N/A                                |
| Guinea Pig anti-dPERIOD (GP73) (1:1000)                                | Gift from I. Edery          | N/A                                |
| <b>Bacterial and Virus Strains</b>                                     |                             |                                    |
| One shot TOP10 Chemically Competent <i>E.coli</i>                      | Thermo Fisher Scientific    | Cat# C404010                       |
| CellLight™ Golgi-RFP, BacMam 2.0                                       | Thermo Fisher Scientific    | Cat# C10593                        |
| AAV1-CMV-m-CORO7-2A-mCherry                                            | Vector Biolabs              | Cat# AAV-255958                    |
| AAV1-CMV-mCherry                                                       | Vector Biolabs              | Cat# 7103                          |
| AAV1-hSyn-mVIP-WPRE                                                    | Vector Biolabs              | Cat# AAV-276014                    |
| pENN.AAV.hSyn.HI.eGFP-Cre.WPRE.SV40 (AAV1)                             | Addgene (J.M. Wilson)       | Addgene viral prep #105540-AAV1    |
| pAAV.hSyn.eGFP.WPRE.bGH (AAV1)                                         | Addgene (J.M. Wilson)       | Addgene viral prep # 105539-AAV1   |
| pENN.AAV.hSyn.Cre.WPRE.hGH (AAV1)                                      | Addgene (J.M. Wilson)       | Addgene viral prep # 105553-AAV1   |
| <b>Chemicals, Peptides, and Recombinant Proteins</b>                   |                             |                                    |
| Protease Inhibitor Cocktail                                            | Sigma-Aldrich               | Cat# SRE0055                       |
| 4-20% Mini-PROTEAN TGX Precast Gels (10/12 wells)                      | BioRad                      | Cat# 4561095                       |
| Polyvinylidene difluoride (PVDF) membranes                             | Millipore                   | Cat# IPVH00010                     |
| SuperSignal West Femto Maximum Sensitivity Substrate                   | Thermo Fisher Scientific    | Cat# 34095                         |
| VECTASTAIN ABC-HRP kit                                                 | Vector Laboratories         | Cat# PK-4000                       |
| DAB Peroxidase (HRP) Substrate Kit (with nickel) 3,3'-diaminobenzidine | Vector Laboratories         | Cat# SK-4100                       |
| Permount Mounting Media                                                | Thermo Fisher Scientific    | Cat# SP15-500                      |
| VECTASHIELD Antifade Mounting Medium                                   | Vector Laboratories         | Cat# H-1000                        |
| iTaq Universal SYBR Green Supermix                                     | BioRad                      | Cat# 1725124                       |
| SsoFast EvaGreen Supermix                                              | BioRad                      | Cat# 1725201                       |
| Fetal Bovine Serum (FBS), Premium                                      | Wisent                      | Cat# 098150                        |
| Penicillin-Streptomycin (10,000 U/mL)                                  | Thermo Fisher Scientific    | Cat# 15140-122                     |
| 0.25% Trypsin/EDTA                                                     | Wisent                      | Cat# 325-043-EL                    |
| Poly-D-lysine                                                          | Sigma                       | Cat# P6403                         |
| Lipofectamine 3000 Transfection Reagent                                | Thermo Fisher Scientific    | Cat# L3000015                      |
| D-Biotin                                                               | Bio Basic                   | Cat# BB0078                        |
| Cycloheximide                                                          | Sigma                       | Cat# C7698                         |
| MG-132                                                                 | Sigma                       | Cat# 474787                        |
| Bafilomycin A1                                                         | Cayman Chemical             | Cat# 11038-500                     |
| E64d                                                                   | Selleck Chemicals           | Cat# S7393                         |
| Pepstatin A                                                            | Tocris Bioscience           | Cat# 1190/10                       |
| Sodium pyruvate (100mM)                                                | Thermo Fisher Scientific    | Cat# 11360070                      |

|                                                                        |                                     |                                       |
|------------------------------------------------------------------------|-------------------------------------|---------------------------------------|
| HEPES (1M)                                                             | Thermo Fisher Scientific            | Cat#15630080                          |
| L-Glutamine                                                            | Thermo Fisher Scientific            | Cat# 25030081                         |
| B-27 supplement                                                        | Thermo Fisher Scientific            | Cat# 17504044                         |
| Critical Commercial Assays                                             |                                     |                                       |
| RNAscope Multiplex Fluorescent Reagent Kit v2                          | Advanced Cell Diagnostics           | Cat# 323100                           |
| RNeasy Micro Kit                                                       | QIAGEN                              | Cat# 74004                            |
| Presto Endotoxin Free Mini Plasmid Kit                                 | Geneaid                             | Cat# PEH100                           |
| PureYield Plasmid Midiprep System                                      | Promega                             | Cat# A2492                            |
| iScript cDNA synthesis kit                                             | BioRad                              | Cat# 1708890                          |
| GFP ELISA kit                                                          | Abcam                               | Cat# ab171581                         |
| mCherry ELISA kit                                                      | Abcam                               | Cat# ab221829                         |
| ProteoExtract kit                                                      | MilliporeSigma                      | Cat# 5391801KIT                       |
| Deposited Data                                                         |                                     |                                       |
| MS proteomics data                                                     | PRIDE repository                    | Project accession: PXD020630          |
| Experimental Models: Cell Lines                                        |                                     |                                       |
| Human: WT HEK293T cells                                                | Gift from S.Tripathi <sup>1</sup>   | N/A                                   |
| Human: <i>UBR4</i> KO HEK293T cells                                    | Gift from S.Tripathi <sup>1</sup>   | N/A                                   |
| Experimental Models: Organisms/Strains                                 |                                     |                                       |
| Mouse: C57BL6/J                                                        | The Jackson Laboratory              | JAX: 000664                           |
| Mouse: <i>Slc32a1</i> <sup>tm2(cre)Lowl</sup> ( <i>Vgat-ires-Cre</i> ) | The Jackson Laboratory <sup>2</sup> | JAX: 016962                           |
| Mouse: <i>Ubr4</i> <sup>tm1.2Nkt</sup> ( <i>p600 flox/flox</i> )       | The Jackson Laboratory <sup>3</sup> | JAX: 024844                           |
| <i>D.melanogaster</i> : <i>w</i> <sup>1118</sup>                       | Bloomington                         | RRID: BDSC_5905                       |
| <i>D.melanogaster</i> : UAS- <i>Dicer2</i> ; <i>tim</i> -GAL4          | Gift from O. Shafer                 | N/A                                   |
| <i>D. melanogaster</i> : Pdf-GAL4                                      | Gift from P. Taghert                | N/A                                   |
| <i>D. melanogaster</i> : <i>elav</i> [C155]; UAS- <i>Dicer2</i>        | Bloomington                         | RRID: BDSC_25750                      |
| <i>D. melanogaster</i> : UAS- <i>Dicer2</i>                            | Bloomington                         | RRID: BDSC_24651                      |
| <i>D. melanogaster</i> : UAS- <i>poe</i> RNAi; P{KK101471}VIE-260B     | Vienna Drosophila Resource Center   | VDRG: 108296; Flybase ID: FBgn0011230 |
| <i>D. melanogaster</i> : UAS- <i>CD2</i> -HRP                          | C.-H. Lee                           | N/A                                   |
| Oligonucleotides                                                       |                                     |                                       |
| qPCR primers, See Supplementary Table 5                                | IDT                                 | N/A                                   |
| NPY cloning primers, See Supplementary Table 5                         | IDT                                 | N/A                                   |
| ON-TARGETplus Mouse <i>Ubr4</i> siRNA, SMARTpool                       | Horizon Discovery                   | Cat# L-050850-00-0005                 |
| ON-TARGETplus non-targeting pool                                       | Horizon Discovery                   | Cat# D-001810-10-20                   |
| Recombinant DNA                                                        |                                     |                                       |
| NPY-EGFP                                                               | Addgene <sup>4</sup>                | Addgene plasmid #74629                |
| pCAGImC_Empty                                                          | Addgene <sup>5</sup>                | Addgene plasmid # 92015               |
| pmCherry-C1 mCherry-NLS                                                | Addgene <sup>6</sup>                | Addgene plasmid #58476                |
| Str-KDEL_SBP-EGFP-GPI                                                  | Addgene <sup>7</sup>                | Addgene plasmid #65294                |
| Str-KDEL_SBP-EGFP-NPY                                                  | This paper                          | N/A                                   |

|                                     |                                   |                                                                                                                                                                                                                                                                             |
|-------------------------------------|-----------------------------------|-----------------------------------------------------------------------------------------------------------------------------------------------------------------------------------------------------------------------------------------------------------------------------|
| Flag-CORONIN 7                      | Gift from R.-H. Chen <sup>8</sup> | N/A                                                                                                                                                                                                                                                                         |
| V5-PER2                             | Gift from N. Cermakian            | N/A                                                                                                                                                                                                                                                                         |
| V5-hUbr4-IRES-mCherry               | This paper                        | N/A                                                                                                                                                                                                                                                                         |
| V5-hUbr4 (Ala)-IRES-mCherry         | This paper                        | N/A                                                                                                                                                                                                                                                                         |
| V5-hUbr4 (Del)-IRES-mCherry         | This paper                        | N/A                                                                                                                                                                                                                                                                         |
| <b>Software and Algorithms</b>      |                                   |                                                                                                                                                                                                                                                                             |
| ClockLab Software                   | Actimetrics                       | <a href="http://www.actimetrics.com/products/clocklab/">http://www.actimetrics.com/products/clocklab/</a>                                                                                                                                                                   |
| ImageJ 1.52a                        | National Institute of Health, USA | <a href="https://imagej.nih.gov/ij/">https://imagej.nih.gov/ij/</a>                                                                                                                                                                                                         |
| Metamorph v7.10                     | Molecular Devices                 | <a href="https://www.moleculardevices.com/products/cellular-imaging-systems/acquisition-and-analysis-software/metamorph-microscopy#gref">https://www.moleculardevices.com/products/cellular-imaging-systems/acquisition-and-analysis-software/metamorph-microscopy#gref</a> |
| Zen 2010 Software                   | ZEISS                             | <a href="https://www.zeiss.com/corporate/int/home.html">https://www.zeiss.com/corporate/int/home.html</a>                                                                                                                                                                   |
| MaxQuant v1.6.6.0                   | See reference <sup>9</sup>        | <a href="https://maxquant.org/">https://maxquant.org/</a>                                                                                                                                                                                                                   |
| Perseus v1.6.6.0                    | See reference <sup>10</sup>       | <a href="https://maxquant.org/perseus">https://maxquant.org/perseus</a>                                                                                                                                                                                                     |
| DAVID Bioinformatics Resources 6.8  | See reference <sup>11,12</sup>    | <a href="https://david.ncifcrf.gov/tools.jsp">https://david.ncifcrf.gov/tools.jsp</a>                                                                                                                                                                                       |
| DAM system                          | TriKinetics Inc.                  | <a href="https://trikinetics.com/">https://trikinetics.com/</a>                                                                                                                                                                                                             |
| MATLAB R2020a                       | Mathworks, Inc.                   | <a href="https://www.mathworks.com/products/matlab.html">https://www.mathworks.com/products/matlab.html</a>                                                                                                                                                                 |
| Fly toolbox                         | Levine lab <sup>13</sup>          | N/A                                                                                                                                                                                                                                                                         |
| GraphPad Prism v8.3.1               | GraphPad Software                 | <a href="https://www.graphpad.com/">https://www.graphpad.com/</a>                                                                                                                                                                                                           |
| <b>Other</b>                        |                                   |                                                                                                                                                                                                                                                                             |
| RNAscope probe: Mm- <i>Ubr4</i>     | Advanced Cell Diagnostics         | Cat# 415971                                                                                                                                                                                                                                                                 |
| RNAscope probe: Dm- <i>poe</i>      | Advanced Cell Diagnostics         | Cat# 583491                                                                                                                                                                                                                                                                 |
| RNAscope probe: Dm- <i>Pdf-C3</i>   | Advanced Cell Diagnostics         | Cat# 457471-C3                                                                                                                                                                                                                                                              |
| Opal 520 reagent                    | PerkinElmer Inc                   | Cat# FP1487A                                                                                                                                                                                                                                                                |
| Opal 570 reagent                    | PerkinElmer Inc                   | Cat# FP1488A                                                                                                                                                                                                                                                                |
| C-18 ZipTip                         | Millipore                         | Cat# ZTC18S960                                                                                                                                                                                                                                                              |
| Acclaim PepMap trap column          | Thermo Fisher Scientific          | Cat# 164946                                                                                                                                                                                                                                                                 |
| EASY-Spray PepMap analytical column | Thermo Fisher Scientific          | Cat# ES803A                                                                                                                                                                                                                                                                 |

**Supplementary Table 5. Primer and synthesized DNA sequences for qRT-PCR and cloning.**

|                                           |                           |                                           |                             |
|-------------------------------------------|---------------------------|-------------------------------------------|-----------------------------|
| Primers                                   |                           |                                           |                             |
| <i>mPer1</i> <sup>14</sup>                |                           |                                           |                             |
| Forward: TGGCTCAAGTGGCAATGAGTC            |                           | Reverse: GGCTCGAGCTGACTGTTCCT             |                             |
| <i>mPer2</i> <sup>14</sup>                |                           |                                           |                             |
| Forward: CCATCCACAAGAAGATCCTAC            |                           | Reverse: GCTCCACGGGTTGATGAAGC             |                             |
| <i>Clock</i> <sup>15</sup>                |                           |                                           |                             |
| Forward: TGTCTCAAGCTGCAAATTTACCA          |                           | Reverse: TTTAGATGCTGCATGGCTCCTA           |                             |
| <i>Bmal1</i> <sup>15</sup>                |                           |                                           |                             |
| Forward: CCGTGCTAAGGATGGCTGTT             |                           | Reverse: TTGGCTTGTAGTTTGCTTCTG            |                             |
| <i>Avp</i> <sup>15</sup>                  |                           |                                           |                             |
| Forward: GCTGCCAGGAGGAGAACTAC             |                           | Reverse: AAAAACCGTCGTGGCACTC              |                             |
| <i>Vip</i> <sup>15</sup>                  |                           |                                           |                             |
| Forward: CAGTTCCTGGCATTCCCTGAT            |                           | Reverse: GGTCACCTGCTCCTTCAAAC             |                             |
| <i>Mouse Gapdh</i> (this paper)           |                           |                                           |                             |
| Forward: CATGGCCTTCCGTGTTCCCTA            |                           | Reverse: CCTGCTTACCACCTTCTTGA             |                             |
| <i>Human GAPDH</i> (this paper)           |                           |                                           |                             |
| Forward: CCATGGGGAAGGTGAAGGTC             |                           | Reverse: TGAAGGGGTCATTGATGGCA             |                             |
| <i>Human Coronin 7</i> (this paper)       |                           |                                           |                             |
| Forward: GTGACATTTCGAGCAGGAACC            |                           | Reverse: CTTGTCCTCTCCTTGGCCTT             |                             |
| <i>poe</i> (this paper)                   |                           |                                           |                             |
| Forward: CCAGGTCCCAGTGGCGTTGC             |                           | Reverse: AGGCGCACCTCATTGCCAGG             |                             |
| <i>rp49</i> <sup>16</sup>                 |                           |                                           |                             |
| Forward: ATCGGTTACGGATCGAACAA             |                           | Reverse: GACAATCTCCTTGGCCTTCT             |                             |
| NPY cloning primers (this paper)          |                           |                                           |                             |
| Forward: AGGGCCGGCCATACCCCTCCAAGCCGGACAAC |                           | Reverse: AGCTCGAGTTACCACATTGCAGGGTCTTCAAG |                             |
| <u>Gateway LR Cloning</u>                 |                           |                                           |                             |
| <u>Entry clone</u>                        | <u>Destination vector</u> | <u>Final construct</u>                    | <u>Expressed protein</u>    |
| pENTR3ChUBR4                              | pCAGImC_Empty             | pCAGImC_hUbr4                             | V5-hUbr4-IRES-mCherry       |
| pENTR3C_hUBR4_ubrbox_Ala                  | pCAGImC_Empty             | pCAGImC_hUbr4(Ala)                        | V5-hUbr4 (Ala)-IRES-mCherry |
| pENTR3C_hUBR4_ubrbox_Del                  | pCAGImC_Empty             | pCAGImC_hUbr4(Del)                        | V5-hUbr4 (Del)-IRES-mCherry |

Synthesized DNA for construction of pENTR3C\_hUBR4\_ubrbox\_Ala plasmid (this paper)

ggtaccacgctcacaccgctaaaaatggggatggcgtgggtgctgcccacagtggctgctaagggtgctgccaaggatgctgagattcctatgccaagtatggatc  
cttcttcgctgacgctggagccaaggaagatggcagcgccttggctctggtgaagagaactcctagcagtgccatgagctctacatgaaggagtcggcatttcag  
agtgaaccaggatcagagagtctagtgcgtcatgccagcacctcctcgcagctgacaaagccaaggtaccatcagtgatggaagggtgctgacgaaga  
gaagccaagaagagcagcctctgcccacagtagagggctgccgggaggaattacagaaccaggccaatttctcctcgtcctcctcgtgtagacatgcttaa  
ttccttatggatgccattcagaccaactccagcaagctcagccgtcgggagcagcagccgtgctcagcaagccctcagtgagctacacactgtggagaaggc  
agtggagatgacagaccagctgatggtcccaccttagggctccaggaagggtgccttgagaatgtgcggatgaattacagtgagaccaggggccagaccatcc  
ggcagctgatcagtgctcatgtgctcaggcgggtggctatgtgtgctctcctcctccatggcgccgccaacattggctgctcagccatgagaagggaagatc  
accgttctgacgctctcactcctgaagcaagcagattccagcaaaaggaagtaactctgacccgcttgcttctgcccagttcctttactgtgtgagcctcac  
aggaaatccctgcaaggaagactactggcggttgtgggctaaggactgctatgtgctcaccttagtagctcaggctctgtttcggatcacttggtttgacccctca  
gttggcaacggggaacttcatcatcaaagccgtgtggttacctggt

Synthesized DNA for construction of pENTR3C\_hUBR4\_ubrbox\_Del plasmid (this paper)

ggtaccacgtgaagagaactcctagcagtgccatgagctctacatgaaggagtcggcatttcagagtgaaccaggatttcagagagtctagtgcgtcatgcca  
gcacctcctcgcagctgacaaagccaaggtaccatcagtgatggaagggtgctgacgaagagaagccaagaagagcagcctctgcccacagtagag  
ggctgccgggaggaattacagaaccaggccaatttctcctcgtcctcctcgtgtagacatgcttaattccttatggatgccattcagaccaactccagcaagctc  
agccgtcgggagcagcagccgtgctcagcaagccctcagtgagctacacactgtggagaaggcagtgagatgacagaccagctgatggtcccaccttagg  
gtcccaggaagggtgcctttgagaatgtgcggatgaattacagtgagaccaggggccagaccatccggcagctgatcagtgctatgtgctcaggcgggtggctat  
gtgtgctcctcctccatggcgccgccaacattggctgctcagccatgagaagggaagatcacccgttctgacgctcctcactcctgaagcaagcagatt  
ccagcaaaaggaagtaactctgacccgcttgcttctgcccagttcctttactgtgtgagcctcacaggaaatccctgcaaggaagactactggcggttgtgg  
gctaaggactgctatgtgctcaccttagtagctcaggctctgtttcggatcacttggtttgacccctcagttggcaacggggaacttcatcatcaaagccgtgtggt  
acctggt

## Supplementary References

1. Tripathi, S. *et al.* Meta- and Orthogonal Integration of Influenza 'oMICs' Data Defines a Role for UBR4 in Virus Budding. *Cell Host Microbe* **18**, 723–735 (2015).
2. Vong, L. *et al.* Leptin Action on GABAergic Neurons Prevents Obesity and Reduces Inhibitory Tone to POMC Neurons. *Neuron* **71**, 142–154 (2011).
3. Nakaya, T. *et al.* p600 Plays Essential Roles in Fetal Development. *PLoS One* **8**, e66269 (2013).
4. Taraska, J. W., Perrais, D., Ohara-Imaizumi, M., Nagamatsu, S. & Almers, W. Secretory granules are recaptured largely intact after stimulated exocytosis in cultured endocrine cells. *Proc. Natl. Acad. Sci. U. S. A.* **100**, 2070–2075 (2003).
5. Golden, R. J. *et al.* An Argonaute phosphorylation cycle promotes microRNA-mediated silencing. *Nature* **542**, 197–202 (2017).
6. Belin, B. J., Lee, T. & Mullins, R. D. DNA damage induces nuclear actin filament assembly by Formin -2 and Spire- $\frac{1}{2}$  that promotes efficient DNA repair. *Elife* **4**, e07735 (2015).
7. Boncompain, G. *et al.* Synchronization of secretory protein traffic in populations of cells. *Nat. Methods* **9**, 493–498 (2012).
8. Yuan, W. C. *et al.* K33-Linked Polyubiquitination of Coronin 7 by Cul3-KLHL20 Ubiquitin E3 Ligase Regulates Protein Trafficking. *Mol. Cell* **54**, 586–600 (2014).
9. Cox, J. & Mann, M. MaxQuant enables high peptide identification rates, individualized p.p.b.-range mass accuracies and proteome-wide protein quantification. *Nat. Biotechnol.* **26**, 1367–1372 (2008).
10. Tyanova, S. *et al.* The Perseus computational platform for comprehensive analysis of (prote)omics data. *Nature Methods* **13**, 731–740 (2016).
11. Huang, D. W., Sherman, B. T. & Lempicki, R. A. Bioinformatics enrichment tools: Paths toward the comprehensive functional analysis of large gene lists. *Nucleic Acids Res.* **37**, 1–13 (2009).
12. Huang, D. W., Sherman, B. T. & Lempicki, R. A. Systematic and integrative analysis of large gene lists using DAVID bioinformatics resources. *Nat. Protoc.* **4**, 44–57 (2009).
13. Levine, J. D., Funes, P., Dowse, H. B. & Hall, J. C. Signal analysis of behavioral and molecular cycles. *BMC Neurosci.* **3**, 1 (2002).
14. Fustin, J.-M. *et al.* Rhythmic Nucleotide Synthesis in the Liver: Temporal Segregation of Metabolites. *Cell Rep.* **1**, 341–349 (2012).
15. Parsons, M. J. *et al.* The Regulatory Factor ZFH3 Modifies Circadian Function in SCN via an at Motif-Driven Axis. *Cell* **162**, 607–621 (2015).
16. Krupp, J. J. *et al.* Pigment-Dispersing Factor Modulates Pheromone Production in Clock Cells that Influence Mating in *Drosophila*. *Neuron* **79**, 54–68 (2013).
